1 **TITLE**

2 Rad51 Interaction Analysis Reveals a Functional Interplay Among Recombination Auxiliary  
3 Factors

4

5 **AUTHORS AND AFFILIATIONS**

6 Bilge Argunhan<sup>1,6</sup>, Masayoshi Sakakura<sup>2,6</sup>, Negar Afshar<sup>1</sup>, Misato Kurihara<sup>2,5</sup>, Kentaro Ito<sup>1</sup>,  
7 Takahisa Maki<sup>1</sup>, Shuji Kanamaru<sup>1</sup>, Yasuto Murayama<sup>3</sup>, Hideo Tsubouchi<sup>1</sup>, Masayuki  
8 Takahashi<sup>4</sup>, Hideo Takahashi<sup>2,7</sup>, Hiroshi Iwasaki<sup>1,4, 7\*</sup>

9

10 <sup>1</sup>Institute of Innovative Research, Tokyo Institute of Technology, Tokyo, Japan.

11 <sup>2</sup>Graduate School of Medical Life Science, Yokohama City University, Yokohama, Japan.

12 <sup>3</sup>Center for Frontier Research, National Institute of Genetics, Shizuoka, Japan.

13 <sup>4</sup>School of Life Science and Technology, Tokyo Institute of Technology, Tokyo, Japan.

14 <sup>5</sup>Present address: Nomura Research Institute, Ltd., Tokyo, Japan

15 <sup>6</sup>These authors contributed equally to this work.

16 <sup>7</sup>Co-corresponding authors.

17 \*Lead contact: [hiwasaki@bio.titech.ac.jp](mailto:hiwasaki@bio.titech.ac.jp)

18

19 Running Title: Interplay Among Rad51 Mediators

1 **ABSTRACT**

2 Although Rad51 is the key protein in homologous recombination (HR), a major DNA double-  
3 strand break repair pathway, several auxiliary factors interact with Rad51 to promote  
4 productive HR. Here, we present an interdisciplinary characterization of the interaction  
5 between Rad51 and Swi5-Sfr1, a widely conserved auxiliary factor. NMR and site-specific  
6 crosslinking experiments revealed two distinct sites within the intrinsically disordered N-  
7 terminus of Sfr1 that cooperatively bind to Rad51. Although disruption of this binding severely  
8 impaired Rad51 stimulation in vitro, interaction mutants did not show any defects in DNA repair.  
9 Unexpectedly, in the absence of the Rad51 paralogs Rad55-Rad57, which constitute another  
10 auxiliary factor complex, these interaction mutants were unable to promote DNA repair. Our  
11 findings provide molecular insights into Rad51 stimulation by Swi5-Sfr1 and suggest that,  
12 rather than functioning in an independent subpathway of HR as was previously proposed,  
13 Rad55-Rad57 facilitates the recruitment of Swi5-Sfr1 to Rad51.

14

15 **KEYWORDS**

16 Homologous recombination, Rad51, auxiliary factor, intrinsically disordered, Swi5-Sfr1,  
17 Rad55-Rad57, Rad51 paralogs, protein NMR

1 DNA double-strand breaks (DSBs) are a particularly toxic form of DNA damage in which a  
2 DNA molecule is broken into two fragments. A major DSB repair pathway is homologous  
3 recombination (HR). During HR, an intact stretch of DNA that shares sequence similarity to  
4 the DSB site is identified and utilized as a template for synthesis-dependent repair.  
5 Dysregulation of HR results in misrepair of DSBs, resulting in genomic instability, a potent  
6 driver of tumorigenesis<sup>1</sup>.

7 HR is initiated by the formation of 3' single-stranded DNA (ssDNA) at the DSB site.  
8 This ssDNA is bound by RPA then the ubiquitous RecA-family recombinase Rad51, which  
9 forms a right-handed nucleoprotein filament. The Rad51 filament is able to capture intact  
10 double-stranded DNA (dsDNA) and—by assessing the extent of base-pairing with the  
11 filamentous ssDNA—identify regions of DNA that share substantial sequence similarity to the  
12 DSB site<sup>2</sup>. After initial pairing with the complementary strand of the dsDNA, the Rad51 filament  
13 further displaces the noncomplementary strand by driving strand transfer, resulting in the  
14 formation of an intermediate structure known as a displacement loop. The 3' end of the  
15 invading strand is then utilized as a primer for DNA synthesis, leading to its extension and the  
16 recovery of lost genetic information. In the simplest case, ejection of this extended strand  
17 allows it to anneal with the complementary DNA on the other side of the DSB<sup>3</sup>.  
18 Recombinational DNA repair is completed following gap filling by further DNA synthesis and  
19 ligation of resultant nicks.

20 Efforts to elucidate the underlying biochemistry of HR have typically involved  
21 measuring the ability of purified Rad51 to drive pairing and subsequent strand transfer of  
22 homologous DNA substrates, a process known as DNA strand exchange. Such experiments  
23 established RPA as a critical component of the DNA strand exchange reaction<sup>4</sup>. However,  
24 when RPA was added to the reaction concomitantly with Rad51, which more closely reflects  
25 the situation in vivo, this stimulatory effect was abolished. This paradoxical finding led to the  
26 discovery that other proteins known to be involved in HR serve as auxiliary factors that interact  
27 directly with Rad51 and can negate the inhibitory effect of RPA<sup>5-11</sup>.

1            Numerous distinct families of recombination auxiliary factors have been identified  
2 throughout eukaryotes, including Rad52, BRCA2, Rad54, Rad51 paralogs, Swi5-Sfr1 and the  
3 Shu complex<sup>12</sup>. Each group is thought to have non-overlapping roles in HR, although the  
4 mechanistic differences are yet to be elucidated<sup>13-18</sup>. Aside from the Shu complex, all auxiliary  
5 factors are capable of binding directly to Rad51, which is thought to be essential for their  
6 respective roles in HR<sup>12</sup>. Sfr1 was initially discovered in the fission yeast  
7 *Schizosaccharomyces pombe* as an interactor of Rad51, and along with Swi5, was shown to  
8 comprise an HR sub-pathway that functions independently of and in parallel to the Rad51  
9 paralogs Rad55-Rad57<sup>17,19</sup>. Subsequent biochemical reconstitutions demonstrated that  
10 substoichiometric concentrations of Swi5-Sfr1 were able to efficiently stimulate the strand  
11 exchange activity of Rad51 and Dmc1, the meiosis-specific RecA-family recombinase<sup>20</sup>. This  
12 enhancement of strand exchange was attributed to stabilization of the nucleoprotein filaments  
13 and stimulation of the recombinases' ATPase activity<sup>20-22</sup>. Rad51-driven DNA strand exchange  
14 was recently shown to fit a three-step kinetic model with two reaction intermediates<sup>23</sup>. Swi5-  
15 Sfr1 enhanced transitioning of the first intermediate into the second intermediate and  
16 conversion of the second intermediate into reaction products, thus making it the only auxiliary  
17 factor known to potentiate Rad51 in both the presynaptic and synaptic phases of DNA strand  
18 exchange. These findings highlight the unique role of Swi5-Sfr1 as an HR regulator.

19            Limited proteolysis of Swi5-Sfr1 yielded a stable C-terminal fragment in complex with  
20 Swi5 (Swi5-Sfr1C, residues 181-299 of Sfr1)<sup>24</sup>, and this, along with the N-terminal half of Sfr1  
21 (Sfr1N, residues 1-176 of Sfr1), could be stably expressed and purified<sup>25</sup>. Whereas Sfr1N was  
22 predicted to be intrinsically disordered<sup>26,27</sup>, crystallographic analyses demonstrated that Swi5-  
23 Sfr1C forms a kinked structure<sup>25</sup>. Moreover, Swi5-Sfr1C was shown to stimulate Rad51-driven  
24 strand exchange by stabilizing the presynaptic filament and enhancing the ATPase activity of  
25 Rad51<sup>25</sup>. In contrast, Sfr1N had no direct effect on these activities but was seen to co-  
26 immunoprecipitate (co-IP) with Rad51. Such complex formation was not detected between  
27 Rad51 and Swi5-Sfr1C, despite the stimulatory effect of Swi5-Sfr1C on Rad51. Taken  
28 together with the observation that Swi5-Sfr1C was only able to stimulate Rad51 activity when

1 present at much higher concentrations than full-length Swi5-Sfr1, these results led to a model  
2 in which Sfr1N keeps Swi5-Sfr1C anchored in close proximity to Rad51<sup>25</sup>.

3         Due to the use of truncated proteins in which entire domains were deleted<sup>25</sup>, it was not  
4 possible to determine whether Sfr1N has any function other than anchoring Swi5-Sfr1 to  
5 Rad51. To explore this, we employed an interdisciplinary approach to further characterize  
6 Sfr1N. We provide direct evidence that Sfr1N is intrinsically disordered and contains two sites  
7 that interact cooperatively with Rad51. Mutation of critical residues within these two sites  
8 rendered Rad51 refractory to the stimulatory effects of full-length Swi5-Sfr1, mimicking the  
9 results obtained with Swi5-Sfr1C (i.e., when the N-terminus of Sfr1 is absent), indicating that  
10 the sole function of Sfr1N is to facilitate the interaction between Swi5-Sfr1 with Rad51.  
11 Unexpectedly, and in contrast to the severely impaired Rad51 stimulation observed in vitro,  
12 these interaction mutants only showed defects in Rad51-mediated DNA repair in the absence  
13 of Rad55-Rad57, implying that these Rad51 paralogs can promote the recruitment of Swi5-  
14 Sfr1 to Rad51. Collectively, these results provide a molecular basis for Rad51 stimulation by  
15 Swi5-Sfr1 and reveal a novel interplay between recombination auxiliary factors.

## 1 RESULTS

### 2 Sfr1N is essential for the role of Swi5-Sfr1 in DNA repair

3 Since Sfr1N binds to Rad51 but does not stimulate DNA strand exchange, and Swi5-Sfr1C  
4 stimulates DNA strand exchange despite not forming a detectable complex with Rad51, it was  
5 proposed that Sfr1N functions exclusively to facilitate the interaction between Swi5-Sfr1C and  
6 Rad51<sup>25</sup>. However, it remained possible that Sfr1N only exerts a stimulatory effect when in the  
7 presence of Swi5-Sfr1C. To test this, strand exchange reactions containing purified Rad51  
8 and plasmid-sized DNA substrates (Fig. 1a) were supplemented with equimolar  
9 concentrations of both Sfr1N and Swi5-Sfr1C. Even in this setting, Sfr1N did not have any  
10 stimulatory effect on DNA strand exchange (Fig. 1b,c), raising the possibility that it is  
11 dispensable for the physiological function of Swi5-Sfr1. To determine the requirement for  
12 these two modules in Rad51-dependent DNA repair, strains lacking the C-terminal or N-  
13 terminal half of Sfr1 (*sfr1N* and *sfr1C*, respectively) were constructed. Both strains showed the  
14 same sensitivity to DNA damage as a strain in which Sfr1 was completely absent (*sfr1Δ*; Fig.  
15 1d). Furthermore, combining these truncations with *rad55Δ* sensitized cells to DNA damaging  
16 agents to the same degree as the *sfr1Δ rad55Δ* strain, which displays a complete loss of  
17 Rad51-dependent DNA repair (Supplementary Fig. 1a)<sup>17,19</sup>. Sfr1N and Sfr1C were detected at  
18 comparable levels to full-length Sfr1 by immunoblotting, indicating that the sensitivity of the  
19 *sfr1N* and *sfr1C* strains is not due to a reduction in protein levels (Supplementary Fig. 1b).  
20 Furthermore, this sensitivity was not rescued by fusing Sfr1N or Sfr1C to the SV40 large T  
21 antigen nuclear localization signal, suggesting that the observed phenotype is not caused by  
22 a failure to localize to the nucleus (Supplementary Fig. 1c). Thus, although not essential for  
23 stimulation of Rad51 in vitro, Sfr1N is essential for the function of Swi5-Sfr1 in promoting  
24 Rad51-dependent DNA repair.

25

26 **Sfr1N comprises an intrinsically disordered and flexible domain within the Swi5-Sfr1**  
27 **ensemble**

1 Having confirmed the physiological importance of Sfr1N, a structural approach was employed  
2 to glean insights into the molecular function of Sfr1N. Primary sequence analysis and ion  
3 mobility mass spectrometry of Sfr1N suggested that this domain is intrinsically disordered<sup>26,27</sup>.  
4 To directly test this, Sfr1N was analyzed by circular dichroism (CD) and nuclear magnetic  
5 resonance (NMR) spectroscopy. The CD spectrum of Sfr1N lacked local minima above 210  
6 nm and showed a negative peak at ~200 nm (Fig. 2a), implying a lack of secondary structural  
7 units such as  $\alpha$ -helices and  $\beta$ -sheets<sup>28</sup>. Furthermore, examination of the  $^1\text{H}$ - $^{15}\text{N}$  heteronuclear  
8 single quantum coherence (HSQC) spectrum of Sfr1N revealed that most of the main chain  
9 amide protons resonated in a narrow chemical shift range between 7.7 and 8.7 ppm (Fig. 2b),  
10 which is a characteristic feature of disordered proteins<sup>29</sup>. To extract structural information for  
11 each residue, NMR signals from main-chain  $^1\text{H}_\text{N}$ ,  $^{13}\text{C}_\alpha$ ,  $^{13}\text{CO}$ , and  $^{15}\text{N}_\text{H}$  atoms as well as  $^{13}\text{C}_\beta$   
12 resonances were assigned by analyzing a set of triple resonance spectra. This was assisted  
13 by the  $^1\text{H}$ - $^{15}\text{N}$  HSQC spectra of selectively- $^{15}\text{N}$  labeled versions of Sfr1N and several Sfr1N  
14 variants (Supplementary Fig. 2a-c).

15 The chemical shifts obtained for the main-chain and  $^{13}\text{C}_\beta$  atoms enabled secondary  
16 structure prediction. The secondary chemical shift of  $^{13}\text{C}_\alpha$ ,  $^{13}\text{C}_\beta$ , and  $^{13}\text{CO}$  atoms, which is the  
17 chemical shift difference between the measured values and the corresponding amino acids in  
18 random coil peptides, was determined (Fig. 2c). The majority of Sfr1N residues showed  $^{13}\text{C}$   
19 secondary chemical shift values within a limited range, suggesting that random coil structures  
20 are present in these regions. Nonetheless, a few groups of residues exhibited secondary  
21 chemical shift values outside of this range, raising the possibility that some structures  
22 resembling  $\alpha$ -helices (E27 to D29, D32 to Q34) or  $\beta$ -strands (L103 to K105, R161 to K164)  
23 may form within Sfr1N<sup>30</sup>. Further secondary structure analysis was performed using the  
24 program TALOS+<sup>31</sup>, which predicted Sfr1N to be entirely disordered, with a low probability for  
25  $\alpha$ -helix formation from E27 to S33 (Fig. 2d).

26 To analyze the dynamical features of Sfr1N, the steady state heteronuclear nuclear  
27 Overhauser effect (NOE) for the main-chain amide groups of the protein was analyzed<sup>32,33</sup>.  
28 NOE values for all residues was less than 0.44, indicating that the entire protein is flexible with

1 pico-to-nanosecond timescale motions (Fig. 2e). Such fast motions are typically observed for  
2 unstructured proteins/domains, in agreement with the above results. The NOE values were  
3 not completely uniform, with residues E27 to S33 showing slightly increased values, consistent  
4 with the possibility that this region of the protein may form an  $\alpha$ -helix. Collectively, these results  
5 demonstrate that, unlike the structured Swi5-Sfr1C complex<sup>25</sup>, the N-terminal half of Sfr1 is  
6 intrinsically disordered and flexible.

7

## 8 **Two sites within Sfr1N interact with Rad51**

9 Previous results indicated that Sfr1N facilitates the interaction between Swi5-Sfr1 and Rad51<sup>25</sup>.  
10 To identify the site(s) within Sfr1N that binds to Rad51, NMR spectra of <sup>15</sup>N-labeled Sfr1N  
11 were analyzed in the absence and presence of Rad51. Superimposed <sup>1</sup>H-<sup>15</sup>N HSQC spectra  
12 of <sup>15</sup>N-labeled Sfr1N with increasing amounts of Rad51 were constructed (Fig. 3a). The most  
13 prominent spectral changes, defined as a reduction in signal intensity of >80%, were observed  
14 for 19 out of 142 non-overlapped residues (Fig. 3b,e). In addition to these marked changes,  
15 18 and 20 residues experienced signal intensity reductions of 60-80% and 40-60%,  
16 respectively (Fig. 3e). The signal intensity of these residues was further attenuated by the  
17 incremental addition of Rad51 (Supplementary Fig. 3a-c). Most of these attenuated signals  
18 did not display obvious chemical shift changes following Rad51 binding. However, five  
19 residues (A71, T73, D75, L76, and T146) displayed incremental chemical shift changes and  
20 reductions in signal intensity upon addition of increasing amounts of Rad51 (Fig. 3c and  
21 Supplementary Fig. 3d). The remaining 60 residues that were analyzed experienced minimal  
22 effects upon addition of Rad51 (<40% reduction in signal intensity; Fig. 3d,e). These findings  
23 implicate two sites in Sfr1N, Site 1 (S84 to T114) and Site 2 (T152 to S165), where the most  
24 significantly attenuated signal intensities are sandwiched by moderately attenuated signal  
25 intensities (Fig. 3e), as being important for the Sfr1N-Rad51 interaction. Site 1 is highly basic  
26 and hydrophobic compared to other regions of Sfr1N. Positively charged residues are also a  
27 prominent feature of Site 2, but this site is not especially hydrophobic. These results suggest



1 that, while both Sites 1 and 2 are involved in electrostatic interactions with Rad51, Site 1 may  
2 also participate in hydrophobic interactions with Rad51.

3 To provide further support that Sites 1 and 2 within Sfr1N interact with Rad51, site-  
4 specific crosslinking experiments were conducted (Fig. 4a). Several residues within Sites 1  
5 and 2 were replaced with the photoreactive amino acid *p*-benzoyl-L-phenylalanine (*p*BPA) by  
6 utilizing *Escherichia coli* with an expanded genetic code<sup>34</sup>. Following exposure to UV light,  
7 proteins within ~3 Å of *p*BPA become crosslinked to it<sup>35</sup>. Such crosslinked proteins can be  
8 detected as slow-migrating species by immunoblotting and are implicated in forming part of  
9 the interface in a protein-protein interaction<sup>36</sup>. Rad51 was co-expressed in *E. coli* with Sfr1N  
10 and cells were irradiated with UV. Proteins were then analyzed by immunoblotting with anti-  
11 Rad51 and anti-Sfr1 antibodies. Some non-specific crosslinking was observed when cells  
12 were treated with UV (Supplementary Fig. 3e). In addition to these non-specific crosslinks,  
13 numerous instances of specific crosslinking—defined as being dependent on a TAG mutation,  
14 the inclusion of *p*BPA in the media, and UV treatment—were observed (Fig. 4b). Whereas  
15 several positions within Site 1 showed robust crosslinking to Rad51, positions within Site 2  
16 showed little crosslinking (Fig. 4c and Supplementary Fig. 3f), suggesting that the associations  
17 between Site 2 and Rad51 are more transient than those involving Site 1. Taken together, the  
18 results obtained from the NMR interaction analysis and site-specific crosslinking experiments  
19 indicate that two sites within Sfr1N, designated as Sites 1 and 2, interact with Rad51.

20

## 21 **Sites 1 and 2 cooperatively facilitate the physical and functional interaction between** 22 **Swi5-Sfr1 and Rad51**

23 A sequence alignment of Sfr1 orthologs within the genus *Schizosaccharomyces* highlighted  
24 conserved patches of positively charged residues in Sites 1 and 2 (Supplementary Fig. 4a).  
25 Combined with the knowledge that Sfr1N only co-IPs with Rad51 under low-salt conditions<sup>25</sup>,  
26 it seemed plausible that these residues might be important for electrostatic interactions with  
27 Rad51. Hence, three residues in Site 1 were mutated (3A) and four residues in Site 2 were  
28 mutated (4A). Additionally, these mutants were combined to generate the 7A mutant (Fig. 5A).

1 To directly assess whether these mutations disrupt the interaction with Rad51, Swi5  
2 and full-length Sfr1 were co-purified to homogeneity (Supplementary Fig. 4b). Next, purified  
3 Rad51 was crosslinked to Affi-gel matrix and mixed with Swi5-Sfr1. A substantial fraction of  
4 wild type Swi5-Sfr1 was recovered in the eluate (Rad51-bound fraction), although some of the  
5 protein remained in the flow-through (unbound fraction; Fig. 5b). In contrast, the amount of 3A  
6 and 4A mutant proteins detected in the eluate was reduced, with much of the protein remaining  
7 in the flow-through. The 7A mutant protein was barely detected in the eluate, indicating that  
8 the binding seen in the 3A mutant was dependent on Site 2 and the binding seen in the 4A  
9 mutant was dependent on Site 1. Comparable trends were observed in a co-IP assay that did  
10 not involve crosslinking of Rad51 (Supplementary Fig. 5c). Taken together, these results  
11 suggest that Sites 1 and 2 facilitate the binding of Swi5-Sfr1 to Rad51 in a cooperative manner.

12 In the 7A mutant, both Sites 1 and 2 are mutated but the remainder of the N-terminus  
13 is intact. Thus, the 7A mutant can be employed to test whether the N-terminal domain of Sfr1  
14 has any significant role other than to facilitate binding to Rad51. We therefore proceeded to  
15 characterize the biochemical activities of the 7A mutant. The 3A and 4A mutants were included  
16 to glean further insights into the nature of Rad51 stimulation by Swi5-Sfr1.

17 While Swi5-Sfr1C can stimulate Rad51 activity despite the absence of Sfr1N, 5-to-10-  
18 fold more of the complex is required to achieve the same level of stimulation as full-length  
19 Swi5-Sfr1 (Fig. 1b lanes 3 and 12)<sup>25</sup>, suggesting that the interaction between Sfr1N and Rad51  
20 is important for efficient stimulation of strand exchange. Consistent with the observed  
21 interaction defect, substoichiometric concentrations of the 7A mutant failed to efficiently  
22 stimulate Rad51-driven strand exchange, with a substantially higher concentration of mutant  
23 protein required to achieve a wild type level of joint molecules (JMs, reaction intermediates)  
24 and nicked-circles (NCs, reaction products; Fig. 5c). At 0.25  $\mu$ M, the defect of the 7A protein  
25 was more pronounced for NCs (~15-fold reduction) than JMs (~5-fold reduction), suggesting  
26 that the ability of Swi5-Sfr1 to stimulate both the initial pairing of homologous DNA and the  
27 subsequent strand transfer by Rad51 are defective when the interaction with Sites 1 and 2 are  
28 ablated (Fig. 5d-f). In contrast, the 3A and 4A mutants were able to promote efficient JM and

1 NC formation at substoichiometric concentrations. Nevertheless, the loss of Rad51 stimulation  
2 observed at higher concentrations of wild type Swi5-Sfr1 was attenuated in the 3A and 4A  
3 mutants (Fig. 5c lanes 6, 21 and 28), suggesting that this loss of stimulation occurs due to  
4 unproductive interactions between Swi5-Sfr1 and Rad51. Consistent with this notion, efficient  
5 stimulation of Rad51 was maintained at higher concentrations of the 7A mutant (Fig. 5c lanes  
6 8 and 15) and Swi5-Sfr1C (Fig. 4b,c)<sup>25</sup>. Collectively, these results indicate that interactions  
7 between Rad51 and both Sites 1 and 2 are important for efficient stimulation of strand  
8 exchange.

9

### 10 **Rad51 filament stabilization and ATPase stimulation is mediated by Sites 1 and 2**

11 To determine why stimulation of Rad51-driven strand exchange is inefficient when Sites 1 and  
12 2 are mutated, the molecular roles of Swi5-Sfr1 were considered. At substoichiometric  
13 concentrations, Swi5-Sfr1 effectively stabilizes Rad51 filaments<sup>21</sup>. Thus, it seemed feasible  
14 that the observed impairment in strand exchange might be explained by defects in Rad51  
15 filament stabilization. To test this possibility, filament stability was examined by fluorescence  
16 anisotropy. When Rad51 binds to a fluorescently-labelled oligonucleotide and forms a filament,  
17 the fluorescence anisotropy increases due to a retardation in the motion of the labelled  
18 oligonucleotide (Fig. 6a). The dissociation of Rad51 is accompanied by a reduction in  
19 anisotropy, with the rate of decline reflective of Rad51 filament stability. Rad51-ssDNA  
20 filaments were formed in the presence of ATP and filament collapse was induced via dilution  
21 into reaction buffer containing ATP but lacking DNA and protein. In the absence of Swi5-Sfr1,  
22 the decrement in anisotropy was sharp and reached a value that was observed in the absence  
23 of protein (~0.1) within ~500 seconds. Inclusion of wild type Swi5-Sfr1 resulted in a slower  
24 reduction in anisotropy, indicating that the Rad51 filament had been stabilized (Fig. 6b).  
25 Strikingly, inclusion of the 7A mutant did not result in any obvious filament stabilization (Fig.  
26 6c). Furthermore, although both 3A and 4A mutants showed some stabilization of Rad51  
27 filaments, the magnitude of this stabilization was less than that observed for wild type protein  
28 (Fig. 6d,e). Consistent with these observations, the reaction rate constants ( $k_{off}$ ) for

1 dissociation of Rad51-ssDNA complexes showed a substantial decline in the presence of  
2 Swi5-Sfr1, a lesser decline for the 3A and 4A mutants, and only a marginal decline for the 7A  
3 mutant (Fig. 6f). Taken together, these results indicate that Sites 1 and 2 within Sfr1N interact  
4 cooperatively with Rad51 to facilitate filament stabilization by Swi5-Sfr1.

5 In addition to stabilizing Rad51 filaments, Swi5-Sfr1 has been shown to stimulate the  
6 ATPase activity of Rad51, which is also important for efficient strand exchange<sup>20,21,23</sup>. Since  
7 substoichiometric concentrations of Swi5-Sfr1C failed to efficiently stimulate the ATPase  
8 activity of Rad51<sup>25</sup>, we sought to determine whether Rad51-dependent ATP hydrolysis was  
9 potentiated by the 7A mutant. As expected, wild type Swi5-Sfr1 was able to efficiently enhance  
10 ATP hydrolysis by Rad51 at substoichiometric concentrations (Swi5-Sfr1:Rad51 ratio of 1:20),  
11 with a 1.85-fold increase in ATP turnover (Fig. 6g). In contrast, the 7A mutant only managed  
12 to enhance the ATPase activity of Rad51 1.28-fold, which is similar to the 1.27-fold stimulation  
13 observed with Swi5-Sfr1C. The 3A and 4A mutants stimulated ATP hydrolysis like wild type.  
14 These results suggest that interaction of either Site 1 or 2 with Rad51 is sufficient to promote  
15 efficient stimulation of ATP hydrolysis.

16

### 17 **DNA repair in Sfr1-Rad51 interaction mutants is facilitated by Rad51 paralogs**

18 Collectively, the in vitro defects of the 7A mutant are highly reminiscent of observations made  
19 with Swi5-Sfr1C (i.e., in the absence of Sfr1N). Since the *sfr1C* strain was as sensitive to DNA  
20 damage as *sfr1Δ* (Fig. 1d and Supplementary Fig. 1a,c), it seemed likely that strains  
21 expressing Sfr1 mutant proteins defective in the interaction with Rad51 would also be sensitive  
22 to DNA damage. To test this prediction, strains were constructed in which the native *sfr1*<sup>+</sup>  
23 gene was replaced with either *sfr1-7A*, *sfr1-3A* or *sfr1-4A*. Unexpectedly, the interaction  
24 mutants did not show any obvious sensitivity to DNA damage (Fig. 7a and Supplementary Fig.  
25 5a). A marginal sensitivity was observed for the *sfr1-7A* strain but this was not statistically  
26 significant (Fig. 7b).

27 To explain these results, we considered the possibility that, although the interaction  
28 between Rad51 and Swi5-Sfr1-7A is compromised in vitro, Swi5-Sfr1-7A may still associate

1 with Rad51 in vivo via another Rad51-interacting protein. Previous genetic studies suggested  
2 that there are two HR subpathways in *S. pombe*: one pathway is dependent on Swi5-Sfr1 and  
3 the other pathway is dependent on the Rad51 paralogs Rad55-Rad57<sup>17,19</sup>. Although these two  
4 pathways are thought to function in parallel, promoting Rad51 activity independently of each  
5 other, it remained formally possible that Rad55-Rad57, which interacts with Rad51<sup>11</sup>, could  
6 bind to Swi5-Sfr1-7A and serve as a molecular bridge to facilitate Rad51 stimulation. To  
7 examine this possibility, the interaction mutants were introduced into the *rad55Δ* background.  
8 Strikingly, in the absence of Rad55, the *sfr1-7A* mutant showed the same DNA damage  
9 sensitivity as the *sfr1Δ* mutant (Fig. 7c). Furthermore, both the *sfr1-3A* and *sfr1-4A* mutants  
10 were more sensitive to DNA damage than *sfr1*<sup>+</sup> in the *rad55Δ* background, although this  
11 sensitivity was not as severe as that observed for the *sfr1Δ rad55Δ* and *sfr1-7A rad55Δ* strains  
12 (Fig. 7c,d). Similar results were obtained in the *rad57Δ* background (Supplementary Fig. 5b),  
13 verifying the requirement for an intact Rad55-Rad57 auxiliary factor complex. Importantly,  
14 these results suggest that defects in the direct interaction between Swi5-Sfr1 and Rad51 are  
15 suppressed by a Rad55-Rad57-dependent mechanism that allows Swi5-Sfr1 to stimulate  
16 Rad51 in vivo.

## 1 **DISCUSSION**

2 In this study, we characterized the interaction between Rad51, the key protein in HR, and  
3 Swi5-Sfr1, a widely conserved recombination auxiliary factor. The N-terminal half of Sfr1 was  
4 found to be essential for the role of Swi5-Sfr1 in promoting Rad51-dependent DNA repair (Fig.  
5 1). This domain was shown to be intrinsically disordered (Fig. 2) and contain two sites that  
6 interact with Rad51 (Fig. 3,4). Although mutation of the two interaction sites disrupted the  
7 physical and functional interaction with Rad51 in vitro (Fig. 5,6), unexpectedly, defects in DNA  
8 repair were only observed in the absence of Rad55-Rad57, another auxiliary factor complex  
9 (Fig. 7).

10

### 11 **Cooperative interactions with Rad51 are the primary function of Sfr1N**

12 Although Sfr1N is not essential for stimulation of Rad51-driven DNA strand exchange (Fig.  
13 1b,c)<sup>25</sup>, it was found to be essential for the promotion of Rad51-dependent DNA repair by  
14 Swi5-Sfr1 (Fig. 1d and Supplementary Fig. 1a-c). NMR interaction analysis revealed that two  
15 domains within the N-terminus of Sfr1 interact with Rad51 (Fig. 3 and Supplementary Fig. 3).  
16 Mutation of Site 1 or 2 weakened the interaction with Rad51 while mutation of both sites  
17 resulted in a near-complete loss of interaction (Fig. 5b and Supplementary Fig. 4c), indicating  
18 that Sites 1 and 2 of Sfr1N bind cooperatively to Rad51. Interestingly, Rad51-driven strand  
19 exchange and ATP hydrolysis were significantly impaired only when both sites were mutated  
20 (7A mutant, Fig. 5c-f and 6g). These results indicate that the reduced interaction in the single  
21 site mutants (3A or 4A) is sufficient for Swi5-Sfr1 to fully stimulate Rad51 in these assays.  
22 Although this points towards some functional redundancy, it is possible that these assays were  
23 not sensitive enough to detect marginal defects in the stimulation of Rad51-driven strand  
24 exchange and ATP hydrolysis. Indeed, the fluorescence anisotropy assay revealed a severe  
25 defect in Rad51 filament stabilization for the 7A mutant and a modest defect for the 3A and  
26 4A mutants (Fig. 6b-f), indicating that interaction of both Sites 1 and 2 with Rad51 is important  
27 for efficient filament stabilization. Swi5-Sfr1 has also been shown to stabilize Rad51 filaments

1 against the F-box helicase Fbh1<sup>37</sup>. It would be interesting to test whether the interaction  
2 mutants can function in a similar capacity.

3 The reduction in NMR signals from Sites 1 and 2 in the presence of Rad51 (Fig. 3e),  
4 combined with the gradual chemical shifts observed for some residues (Fig. 3c,d), indicated  
5 that the association and dissociation of Sfr1N and Rad51 is fast on the NMR timescale,  
6 suggesting that the Sfr1N-Rad51 interaction is relatively weak. Like all RecA-family  
7 recombinases, *S. pombe* Rad51 is predicted to exist as a multimer in solution. Consistently,  
8 size-exclusion chromatography yielded a broad elution profile with a retention time  
9 corresponding to ~160 kDa (Supplementary Fig. 6a). While the size of monomeric Rad51  
10 (~40kD) is too small to cause severe line-broadening of NMR signals, the interaction of  
11 multimeric Rad51 with Sfr1N could explain the drastic reduction in NMR signals for Sites 1  
12 and 2. The NMR interaction analysis was largely substantiated by site-specific crosslinking of  
13 residues within Sites 1 and 2 to Rad51 (Fig. 4 and Supplementary Fig. 3e,f). Since both sites  
14 are involved in electrostatic interactions with Rad51, the more robust crosslinking of Site 1  
15 may be due to the added contribution of hydrophobic interactions between Site 1 and Rad51.  
16 Alternatively, it is possible that the incorporation of the aromatic *p*BPA into Site 1 was better  
17 tolerated due to the more hydrophobic nature of this site.

18 Since in vitro results obtained with the 7A mutant complex closely resemble what was  
19 observed in the complete absence of Sfr1N (i.e., with Swi5-Sfr1C), we conclude that the  
20 function of Sfr1N in promoting Rad51-dependent DNA repair primarily involves cooperative  
21 binding of Sites 1 and 2 to Rad51. We nevertheless note that the 7A complex displayed a loss  
22 of DNA binding and 4A showed impaired DNA binding (Supplementary Fig. 6b). *sfr1-3A* is  
23 more sensitive to DNA damage than *sfr1*<sup>+</sup> in the *rad55Δ* background (Fig. 7c,d), despite DNA  
24 binding by 3A being comparable to wild type, arguing that DNA binding by Swi5-Sfr1 is not  
25 relevant to DNA repair. Furthermore, despite their difference in DNA binding, 3A and 4A were  
26 indistinguishable in all other aspects (Fig. 5-7). Although we cannot completely rule out the  
27 possibility that the defects of the 7A mutant are related to a defect in DNA binding, these  
28 results strongly suggest that DNA binding by Swi5-Sfr1 is impertinent to its role in stimulating

1 Rad51 activity or promoting Rad51-dependent DNA repair. Mouse Swi5-Sfr1 (mSwi5-Sfr1),  
2 which stimulates Rad51 through similar mechanisms (see below), does not display any DNA  
3 binding<sup>38</sup> while human Sfr1 (hSfr1) has been implicated in transcriptional regulation<sup>39</sup>, raising  
4 the possibility that the DNA binding activity of *S. pombe* Swi5-Sfr1 may have some relevance  
5 to a function other than DNA repair.

6

### 7 **Rad51 paralogs promote Swi5-Sfr1-dependent DNA repair**

8 While the *sfr1Δ* and *rad55Δ* single mutants are sensitive to DNA damage, neither is as  
9 sensitive as *rad51Δ*, which is epistatic to both<sup>9,19</sup>. However, because the *sfr1Δ rad55Δ* double  
10 mutant shows the same sensitivity as *rad51Δ* (e.g., Fig. 7a)<sup>17,19</sup>, it was concluded that two  
11 independent sub-pathways of HR exist in *S. pombe*<sup>19</sup>. Despite the numerous defects observed  
12 in vitro, the *sfr1-7A* mutant strain was proficient for DNA repair, but this repair was completely  
13 dependent on Rad55-Rad57 (Fig. 7a-d), indicating that a Rad55-Rad57-dependent  
14 mechanism overcomes defects in the binding of Swi5-Sfr1 to Rad51.

15 To explain these results, we propose that the interaction of Swi5-Sfr1 with Rad51 is  
16 enabled by two redundant mechanisms: one through a direct interaction and the other through  
17 Rad55-Rad57, which interacts with Rad51<sup>11</sup> and acts as a molecular bridge to facilitate the  
18 recruitment of Swi5-Sfr1 to Rad51 (Fig. 7e). Hence, although Swi5-Sfr1-7A cannot interact  
19 directly with Rad51, Rad55-Rad57 aids the recruitment of Swi5-Sfr1-7A to Rad51, allowing it  
20 to exert a stimulatory effect on Rad51; this explains why *sfr1-7A* is proficient for DNA repair.  
21 However, in the absence of Rad55 or Rad57, this tethering is lost but Swi5-Sfr1 can  
22 nevertheless promote some DNA repair via its direct interaction with Rad51, thus explaining  
23 why *rad55Δ* is not as sensitive as *rad51Δ*. It is only when both interaction mechanisms are  
24 defective, as in the *rad55Δ sfr1-7A* strain, that the promotion of Rad51-mediated DNA repair  
25 by Swi5-Sfr1 is completely lost. We therefore surmise that, while the Swi5-Sfr1 and Rad55-  
26 Rad57 sub-pathways are capable of operating independently of each other, as observed in  
27 the *rad55Δ* and *sfr1Δ* backgrounds, Swi5-Sfr1 and Rad55-Rad57 likely collaborate to promote



1 Rad51-dependent DNA repair in wild type cells. While physical evidence for this model is  
2 lacking, Rad55-Rad57 facilitates recruitment of the Shu complex to Rad51 by binding to both  
3 and acting as a molecular bridge<sup>14,40</sup>, so it could plausibly fulfill a similar role for Swi5-Sfr1.  
4 However, unlike the Shu complex, Swi5-Sfr1 can interact directly with Rad51 (Fig. 5b and  
5 Supplementary Fig. 4c)<sup>20,25</sup>, so any contribution made by Rad55-Rad57 to this interaction  
6 would enhance rather than enable complex formation with Rad51. The requirement for such  
7 a mechanism may stem from the fact that the direct interaction between Swi5-Sfr1 and Rad51  
8 is relatively weak (see above). Indeed, previous attempts by us and others to co-IP Swi5-Sfr1  
9 and Rad51 from yeast extracts has been unsuccessful<sup>19,41</sup>, suggesting that the cellular  
10 interaction is too weak and/or transient to capture. It is tempting to speculate that Rad55-  
11 Rad57, Swi5-Sfr1, and the Shu complex exist as a higher-order auxiliary factor complex,  
12 perhaps as part of a Rad52-containing DNA repair center<sup>42,43</sup>. Evidence for the existence of  
13 such a complex and elucidation of its molecular function will be the focus of future research.

14

### 15 **Evolutionary conservation of Sfr1N structure and function**

16 CD and NMR spectroscopy directly demonstrated that Sfr1N is an intrinsically disordered and  
17 dynamic domain within the otherwise structured Swi5-Sfr1 ensemble (Fig. 2 and  
18 Supplementary Fig. 2). It was previously proposed that Swi5-Sfr1C inserts into grooves in the  
19 Rad51 nucleoprotein filament, locking the filament in an active conformation<sup>25,26,42</sup>. While this  
20 could explain how Swi5-Sfr1 stabilizes the filament, it does not explain how Swi5-Sfr1  
21 stimulates ATP hydrolysis and extensive strand transfer by Rad51, which are highly dynamic  
22 processes thought to involve dissociation of Rad51 from DNA<sup>23</sup>. It is possible that the flexibility  
23 of Sfr1N allows Swi5-Sfr1 to remain bound to Rad51 despite conformational changes in the  
24 filament. This would entail release of dissociating Rad51 molecules and re-binding of Sfr1N  
25 to molecules incorporated in the filament, thus preventing diffusion of Swi5-Sfr1 from the  
26 Rad51 filament. NMR interaction analysis suggested that binding of Sfr1N to Rad51 is  
27 relatively short-lived (see above), consistent with a model in which the rapid association and  
28 dissociation of Swi5-Sfr1 from Rad51 plays a role in stimulation of DNA strand exchange.

1           Although the role of Swi5-Sfr1 in promoting Rad51-dependent DNA repair is conserved  
2 in mammals<sup>43,45-49</sup>, the precise mode of interaction with Rad51 appears to have undergone  
3 some divergence<sup>43,46,50</sup>. In *Saccharomyces cerevisiae*, the Swi5-Sfr1 homolog Sae3-Mei5 is  
4 produced only during meiosis and functions exclusively in the Dmc1 branch of meiotic HR<sup>51,52</sup>.  
5 Both Swi5-Sfr1 and Sae3-Mei5 stimulate the strand exchange activity of Dmc1 via similar  
6 mechanisms<sup>20,22,53,54</sup>, and although Sae3-Mei5 does interact directly with Rad51, it does not  
7 stimulate the activity of Rad51<sup>55,56</sup>, unlike Swi5-Sfr1.

8           A consistent trend across all examined species is that Sfr1 plays some role in  
9 facilitating the interaction with the recombinase partner. Since the amino acid sequence of the  
10 N-terminal half of Sfr1 shows little conservation compared to the C-terminal half  
11 (Supplementary Fig. 4a), it is tempting to ascribe the similarities among species to the C-  
12 terminus. However, sequence divergence across large evolutionary distances does not  
13 necessarily reflect a lack of functional conservation for intrinsically disordered regions, which  
14 accumulate mutations at a higher rate than structured domains<sup>57</sup>. Notably, the large subunit  
15 of RPA contains an intrinsically disordered region whose function is conserved despite  
16 significant sequence divergence<sup>58</sup>, raising the possibility that the structure and/or function of  
17 Sfr1N is conserved. While empirical evidence is lacking, disorder predictions<sup>59</sup> for the N-  
18 terminal half of *S. pombe* Sfr1 agree with the data presented here (Supplementary Fig. 7a)  
19 and similar profiles were generated for Sfr1 from *Schizosaccharomyces japonicus* and  
20 *Schizosaccharomyces octosporus* (Supplementary Fig. 7b,c). Furthermore, the N-terminal  
21 halves of mSfr1, hSfr1 and Mei5 are predicted to be enriched in intrinsically disordered regions  
22 (Supplementary Fig. 7d-f). This analysis also highlighted potential protein binding sites within  
23 the N-terminal halves of *S. japonicus* Sfr1, hSfr1 and Mei5. In agreement with this, the N-  
24 terminal half of Mei5 has already been shown to interact with Dmc1<sup>52,55</sup>. Thus, in addition to  
25 the conserved function of Swi5-Sfr1 in promoting HR, the intrinsically disordered nature of  
26 Sfr1's N-terminus and its role in facilitating interactions with recombinases may be  
27 evolutionarily conserved. Further studies will be required to test the validity of this prediction.

## 1 **ACKNOWLEDGEMENTS**

2 We thank Tomohiro Koizumi for contributing to the early stages of this study; Yumiko  
3 Kurokawa and Yuki Ide for help with protein purification; and Ryoji Miyazaki, Hiroyuki Mori and  
4 Yoshinori Akiyama for help with the site-specific crosslinking experiments. This study was  
5 supported in part by Grants-in-Aid for Scientific Research on Innovative Areas (15H059749 to  
6 H.I., 18H04626 and 18H05426 to H. Takahashi), for Scientific Research (A) (18H03985 to  
7 H.I.), for Young Scientists (B) (17K15061 to B.A.), for Scientific Research (B) (18H02371 to H.  
8 Tsubouchi and 19H03160 to Y.M.), for Early-Career Scientists (19K16039 to K.I.), and a  
9 Research Fellowship (17J04051 to N.A.) from the Japan Society for the Promotion of Science.  
10 Y.M. also acknowledges support from the Takeda Science Foundation.

11

## 12 **AUTHOR CONTRIBUTIONS**

13 B.A., M.S., H. Takahashi and H.I. conceived and designed the study. M.S. and M.K. performed  
14 all NMR experiments. B.A., N.A., K.I., and T.M. performed all other experiments. M.S., M.K.  
15 and H. Takahashi analyzed NMR data. B.A., N.A., K.I., T.M., S.K., Y.M., H. Tsubouchi, M.T.  
16 and H.I. analyzed all other data. S.K., Y.M., H. Tsubouchi, M.T., H. Takahashi and H.I.  
17 provided expertise and reagents. B.A., M.S., H. Takahashi and H.I. supervised the study. All  
18 authors contributed to writing the manuscript.

19

## 20 **DECLARATION OF INTERESTS**

21 The authors declare no competing interests.

## 1 REFERENCES

- 2 1. Jeggo, P. A., Pearl, L. H. & Carr, A. M. DNA repair, genome stability and cancer: a  
3 historical perspective. *Nat. Rev. Cancer* **16**, 35–42 (2016).
- 4 2. Prentiss, M., Prévost, C. & Danilowicz, C. Structure/function relationships in RecA protein-  
5 mediated homology recognition and strand exchange. *Crit. Rev. Biochem. Mol. Biol.* **50**,  
6 453–476 (2015).
- 7 3. Mehta, A. & Haber, J. E. Sources of DNA double-strand breaks and models of  
8 recombinational DNA repair. *CSH Perspect. Biol.* **6**, a016428 (2014).
- 9 4. Sung, P. Catalysis of ATP-dependent homologous DNA pairing and strand exchange by  
10 yeast RAD51 protein. *Science* **265**, 1241–1243 (1994).
- 11 5. Hays, S. L., Firmenich, A. A. & Berg, P. Complex formation in yeast double-strand break  
12 repair: participation of Rad51, Rad52, Rad55, and Rad57 proteins. *Proc. Natl. Acad. Sci.*  
13 *U.S.A.* **92**, 6925–6929 (1995).
- 14 6. Johnson, R. D. & Symington, L. S. Functional differences and interactions among the  
15 putative RecA homologs Rad51, Rad55, and Rad57. *Mol. Cell Biol.* **15**, 4843–4850 (1995).
- 16 7. Sung, P. Yeast Rad55 and Rad57 proteins form a heterodimer that functions with  
17 replication protein A to promote DNA strand exchange by Rad51 recombinase. *Genes*  
18 *Dev.* **11**, 1111–1121 (1997).
- 19 8. Sung, P. Function of yeast Rad52 protein as a mediator between replication protein A  
20 and the Rad51 recombinase. *J. Biol. Chem.* **272**, 28194–28197 (1997).
- 21 9. Khasanov, F. K. *et al.* A new recombinational DNA repair gene from  
22 *Schizosaccharomyces pombe* with homology to *Escherichia coli* RecA. *Genetics* **152**,  
23 1557–1572 (1999).
- 24 10. Tsutsui, Y., Morishita, T., Iwasaki, H., Toh, H. & Shinagawa, H. A recombination repair  
25 gene of *Schizosaccharomyces pombe*, rhp57, is a functional homolog of the  
26 *Saccharomyces cerevisiae* RAD57 gene and is phylogenetically related to the human  
27 XRCC3 gene. *Genetics* **154**, 1451–1461 (2000).

- 1 11. Tsutsui, Y., Khasanov, F. K., Shinagawa, H., Iwasaki, H. & Bashkirov, V. I. Multiple  
2 interactions among the components of the recombinational DNA repair system in  
3 *Schizosaccharomyces pombe*. *Genetics* **159**, 91–105 (2001).
- 4 12. Zelensky, A., Kanaar, R. & Wyman, C. Mediators of homologous DNA pairing. *CSH*  
5 *Perspect. Biol.* **6**, a016451–a016451 (2014).
- 6 13. Sugawara, N., Wang, X. & Haber, J. E. In vivo roles of Rad52, Rad54, and Rad55 proteins  
7 in Rad51-mediated recombination. *Mol. Cell* **12**, 209–219 (2003).
- 8 14. Khasanov, F. K., Salakhova, A. F., Chepurnaja, O. V., Korolev, V. G. & Bashkirov, V. I.  
9 Identification and characterization of the rlp1+, the novel Rad51 paralog in the fission  
10 yeast *Schizosaccharomyces pombe*. *DNA Repair* **3**, 1363–1374 (2004).
- 11 15. Shor, E., Weinstein, J. & Rothstein, R. A genetic screen for top3 suppressors in  
12 *Saccharomyces cerevisiae* identifies SHU1, SHU2, PSY3 and CSM2: four genes involved  
13 in error-free DNA repair. *Genetics* **169**, 1275–1289 (2005).
- 14 16. Martín, V. *et al.* Sws1 is a conserved regulator of homologous recombination in eukaryotic  
15 cells. *EMBO J.* **25**, 2564–2574 (2006).
- 16 17. Akamatsu, Y. *et al.* Fission yeast Swi5/Sfr1 and Rhp55/Rhp57 differentially regulate  
17 Rhp51-dependent recombination outcomes. *EMBO J.* **26**, 1352–1362 (2007).
- 18 18. Jensen, R. B., Carreira, A. & Kowalczykowski, S. C. Purified human BRCA2 stimulates  
19 RAD51-mediated recombination. *Nature* **467**, 678–683 (2010).
- 20 19. Akamatsu, Y., Dziadkowiec, D., Ikeguchi, M., Shinagawa, H. & Iwasaki, H. Two different  
21 Swi5-containing protein complexes are involved in mating-type switching and  
22 recombination repair in fission yeast. *Proc. Natl. Acad. Sci. U.S.A.* **100**, 15770–15775  
23 (2003).
- 24 20. Haruta, N. *et al.* The Swi5-Sfr1 complex stimulates Rhp51/Rad51- and Dmc1-mediated  
25 DNA strand exchange in vitro. *Nat. Struct. Mol. Biol.* **13**, 823–830 (2006).
- 26 21. Kurokawa, Y., Murayama, Y., Haruta-Takahashi, N., Urabe, I. & Iwasaki, H.  
27 Reconstitution of DNA strand exchange mediated by Rhp51 recombinase and two  
28 mediators. *PLoS Biol.* **6**, e88 (2008).

- 1 22. Murayama, Y., Kurokawa, Y., Tsutsui, Y. & Iwasaki, H. Dual regulation of Dmc1-driven  
2 DNA strand exchange by Swi5-Sfr1 activation and Rad22 inhibition. *Genes Dev.* **27**,  
3 2299–2304 (2013).
- 4 23. Ito, K., Murayama, Y., Takahashi, M. & Iwasaki, H. Two three-strand intermediates are  
5 processed during Rad51-driven DNA strand exchange. *Nat. Struct. Mol. Biol.* **25**, 29–36  
6 (2018).
- 7 24. Kuwabara, N. *et al.* Expression, purification and crystallization of Swi5 and the Swi5-Sfr1  
8 complex from fission yeast. *Acta Crystallogr. Sect. F Struct. Biol. Cryst. Commun.* **66**,  
9 1124–1126 (2010).
- 10 25. Kuwabara, N. *et al.* Mechanistic insights into the activation of Rad51-mediated strand  
11 exchange from the structure of a recombination activator, the Swi5-Sfr1 complex.  
12 *Structure* **20**, 440–449 (2012).
- 13 26. Kokabu, Y. *et al.* Fission Yeast Swi5-Sfr1 Protein Complex, an Activator of Rad51  
14 Recombinase, Forms an Extremely Elongated Dogleg-shaped Structure. *J. Biol. Chem.*  
15 **286**, 43569–43576 (2011).
- 16 27. Saikusa, K. *et al.* Characterisation of an intrinsically disordered protein complex of Swi5-  
17 Sfr1 by ion mobility mass spectrometry and small-angle X-ray scattering. *Analyst* **138**,  
18 1441–1449 (2013).
- 19 28. Greenfield, N. J. Using circular dichroism spectra to estimate protein secondary structure.  
20 *Nat. Protoc.* **1**, 2876–2890 (2006).
- 21 29. Konrat, R. NMR contributions to structural dynamics studies of intrinsically disordered  
22 proteins. *J. Magn. Reson.* **241**, 74–85 (2014).
- 23 30. Wishart, D. S. & Sykes, B. D. The <sup>13</sup>C chemical-shift index: a simple method for the  
24 identification of protein secondary structure using <sup>13</sup>C chemical-shift data. *J. Biomol.*  
25 *NMR* **4**, 171–180 (1994).
- 26 31. Shen, Y., Delaglio, F., Cornilescu, G. & Bax, A. TALOS+: a hybrid method for predicting  
27 protein backbone torsion angles from NMR chemical shifts. *J. Biomol. NMR* **44**, 213–223  
28 (2009).

- 1 32. Farrow, N. A., Muhandiram, R., Singer, A. U., Pascal, S. M., Kay, C. M., Gish, G.,  
2 Shoelson, S. E., Pawson, T., Forman-Kay, J. D., and Kay, L. E. (1994) Backbone  
3 Dynamics of a Free and a Phosphopeptide-Complexed Src Homology 2 Domain Studied  
4 by <sup>15</sup>N NMR Relaxation. *Biochemistry* **33**, 5984-6003
- 5 33. Kay, L. E., Torchia, D. A., and Bax, A. (1989) Backbone dynamics of proteins as studied  
6 by nitrogen-15 inverse detected heteronuclear NMR spectroscopy: application to  
7 staphylococcal nuclease. *Biochemistry* **28**, 8972-8979
- 8 34. Young, T. S., Ahmad, I., Yin, J. A. & Schultz, P. G. An enhanced system for unnatural  
9 amino acid mutagenesis in *E. coli*. *J. Mol. Biol.* **395**, 361–374 (2010).
- 10 35. Tanaka, Y., Bond, M. R. & Kohler, J. J. Photocrosslinkers illuminate interactions in living  
11 cells. *Mol. Biosyst.* **4**, 473–480 (2008).
- 12 36. Miyazaki, R. *et al.* A Novel SRP Recognition Sequence in the Homeostatic Control Region  
13 of Heat Shock Transcription Factor  $\sigma$ 32. *Sci. Rep.* **6**, 24147 (2016).
- 14 37. Tsutsui, Y. *et al.* Multiple regulation of Rad51-mediated homologous recombination by  
15 fission yeast Fbh1. *PLoS Genet.* **10**, e1004542 (2014).
- 16 38. Tsai, S.-P. *et al.* Rad51 presynaptic filament stabilization function of the mouse Swi5-Sfr1  
17 heterodimeric complex. *Nucleic Acids Res.* **40**, 6558–6569 (2012).
- 18 39. Feng, Y. *et al.* DNA homologous recombination factor SFR1 physically and functionally  
19 interacts with estrogen receptor alpha. *PLoS ONE* **8**, e68075 (2013).
- 20 40. Gaines, W. A. *et al.* Promotion of presynaptic filament assembly by the ensemble of *S.*  
21 *cerevisiae* Rad51 paralogues with Rad52. *Nat. Commun.* **6**, 7834 (2015).
- 22 41. Cipak, L. *et al.* An improved strategy for tandem affinity purification-tagging of  
23 *Schizosaccharomyces pombe* genes. *Proteomics* **9**, 4825–4828 (2009).
- 24 42. Lisby, M., Rothstein, R. & Mortensen, U. H. Rad52 forms DNA repair and recombination  
25 centers during S phase. *Proc. Natl. Acad. Sci. U.S.A.* **98**, 8276–8282 (2001).
- 26 43. Lisby, M., Mortensen, U. H. & Rothstein, R. Colocalization of multiple DNA double-strand  
27 breaks at a single Rad52 repair centre. *Nat. Cell Biol.* **5**, 572–577 (2003).

- 1 44. Fornander, L. H. *et al.* Swi5-Sfr1 protein stimulates Rad51-mediated DNA strand  
2 exchange reaction through organization of DNA bases in the presynaptic filament. *Nucleic*  
3 *Acids Res.* **42**, 2358–2365 (2014).
- 4 45. Akamatsu, Y. & Jasin, M. Role for the mammalian Swi5-Sfr1 complex in DNA strand break  
5 repair through homologous recombination. *PLoS Genet.* **6**, e1001160 (2010).
- 6 46. Yuan, J. & Chen, J. The role of the human SWI5-MEI5 complex in homologous  
7 recombination repair. *J. Biol. Chem.* **286**, 9888–9893 (2011).
- 8 47. Su, G.-C. *et al.* Enhancement of ADP release from the RAD51 presynaptic filament by  
9 the SWI5-SFR1 complex. *Nucleic Acids Res.* **42**, 349–358 (2014).
- 10 48. Argunhan, B., Murayama, Y. & Iwasaki, H. The differentiated and conserved roles of Swi5-  
11 Sfr1 in homologous recombination. *FEBS Lett.* **591**, 2035–2047 (2017).
- 12 49. Lu, C.-H. *et al.* Swi5-Sfr1 stimulates Rad51 recombinase filament assembly by  
13 modulating Rad51 dissociation. *Proc. Natl. Acad. Sci. U.S.A.* **115**, E10059–E10068  
14 (2018).
- 15 50. Su, G.-C. *et al.* Role of the RAD51-SWI5-SFR1 Ensemble in homologous recombination.  
16 *Nucleic Acids Res.* **44**, 6242–6251 (2016).
- 17 51. Tsubouchi, H. & Roeder, G. S. The budding yeast mei5 and sae3 proteins act together  
18 with dmc1 during meiotic recombination. *Genetics* **168**, 1219–1230 (2004).
- 19 52. Hayase, A. *et al.* A protein complex containing Mei5 and Sae3 promotes the assembly of  
20 the meiosis-specific RecA homolog Dmc1. *Cell* **119**, 927–940 (2004).
- 21 53. Ferrari, S. R., Grubb, J. & Bishop, D. K. The Mei5-Sae3 protein complex mediates Dmc1  
22 activity in *Saccharomyces cerevisiae*. *J. Biol. Chem.* **284**, 11766–11770 (2009).
- 23 54. Murayama, Y., Tsutsui, Y. & Iwasaki, H. The fission yeast meiosis-specific Dmc1  
24 recombinase mediates formation and branch migration of Holliday junctions by  
25 preferentially promoting strand exchange in a direction opposite to that of Rad51. *Genes*  
26 *Dev.* **25**, 516–527 (2011).
- 27 55. Say, A. F. *et al.* The budding yeast Mei5-Sae3 complex interacts with Rad51 and  
28 preferentially binds a DNA fork structure. *DNA Repair* **10**, 586–594 (2011).



- 1 56. Cloud, V., Chan, Y.-L., Grubb, J., Budke, B. & Bishop, D. K. Rad51 is an accessory factor  
2 for Dmc1-mediated joint molecule formation during meiosis. *Science* **337**, 1222–1225  
3 (2012).
- 4 57. Brown, C. J. *et al.* Evolutionary rate heterogeneity in proteins with long disordered regions.  
5 *J. Mol. Evol.* **55**, 104–110 (2002).
- 6 58. Daughdrill, G. W., Narayanaswami, P., Gilmore, S. H., Belczyk, A. & Brown, C. J. Dynamic  
7 behavior of an intrinsically unstructured linker domain is conserved in the face of negligible  
8 amino acid sequence conservation. *J. Mol. Evol.* **65**, 277–288 (2007).
- 9 59. Jones, D. T. & Cozzetto, D. DISOPRED3: precise disordered region predictions with  
10 annotated protein-binding activity. *Bioinformatics* **31**, 857–863 (2015).

1 **FIGURE LEGENDS**

2 **Figure 1.** Sfr1N is essential for DNA repair mediated by Swi5-Sfr1.

3 **(a)** Schematic of the three-strand exchange assay. **(b)** Three-strand exchange reactions  
4 containing Rad51 with the indicated concentrations of Swi5-Sfr1, or Sfr1N and/or Swi5-Sfr1C,  
5 were incubated for 2 h at 37°C and DNA was separated by agarose gel electrophoresis to  
6 visualize substrates (css, lds), intermediates (JM) and products (NC). **(c)** The percentage of  
7 DNA signal per lane corresponding to JMs and NC (total yield) was plotted against Swi5-Sfr1  
8 concentration. **(d)** Percentage of cell survival following acute UV irradiation for the indicated  
9 strains. For **(c,d)**, mean values of three independent experiments  $\pm$  s.d. are shown.

10

11 **Figure 2.** The N-terminal half of Sfr1 is an intrinsically disordered and flexible domain.

12 **(a)** Far UV spectrum of Sfr1N. **(b)**  $^1\text{H}$ - $^{15}\text{N}$  HSQC spectrum of Sfr1N. Regions outlined in red  
13 and blue are enlarged in the top right and bottom right panels, respectively. **(c)** Secondary  
14 chemical shifts of  $^{13}\text{C}_\alpha$  (top),  $^{13}\text{C}_\beta$  (middle), and  $^{13}\text{CO}$  (bottom) were obtained and plotted  
15 against the corresponding position in Sfr1N. Values that suggest potential  $\alpha$ -helix and  $\beta$ -strand  
16 formation are indicated with red and blue bars, respectively. **(d)** Talos+ prediction of secondary  
17 structure probabilities. Black, red, and blue circles indicate the probabilities of random coils,  
18  $\alpha$ -helices, and  $\beta$ -strands, respectively. **(e)**  $\{^1\text{H}\}$ - $^{15}\text{N}$  heteronuclear NOE was measured for  
19 Sfr1N. All analyzed main chain NHs showed NOE values of less than 0.44.

20

21 **Figure 3.** Two sites within Sfr1N interact with Rad51.

22 **(a)** Superimposed  $^1\text{H}$ - $^{15}\text{N}$  HSQC spectra of  $^{15}\text{N}$ -labeled Sfr1N in the absence of Rad51 or in  
23 the presence of Rad51 at the indicated molar ratios. **(b-d)** Enlarged signals from K108, T73,  
24 and T14 (left), with slices along the  $^1\text{H}$  axis (right). **(e)** Signal intensity ratio of Sfr1N residues  
25 in the presence of Rad51 to those in the absence of Rad51 (left) and features of the Sfr1N  
26 amino acid sequence (right). Reductions in signal intensity of 40-60% (green), 60-80%  
27 (yellow), and >80% (red) are highlighted, along with the corresponding residues. Underlined

1 residues correspond to Site 1 (S84 to T114) and Site 2 (T152 to S168), where the most  
2 significant signal attenuations were observed. Residues not in bold include prolines,  
3 unassigned residues, and residues with overlapped signals.

4

5 **Figure 4.** Residues within Sites 1 and 2 can be site-specifically crosslinked to Rad51

6 **(a)** Schematic of the crosslinking assay. **(b)** Example of Sfr1N-Rad51 crosslinking. The  
7 indicated residues were replaced with an amber codon, or the amber codon was omitted as a  
8 negative control (“none”). XL, specific crosslinks. \*, non-specific crosslinks. **(c)** Summary of  
9 crosslinking results for all residues examined. See Supplementary Fig. 3 for all blots.

10

11 **Figure 5.** Interaction of Sites 1 and 2 with Rad51 is important for stimulation of Rad51-driven  
12 strand exchange. **(a)** Schematic of Sfr1-Rad51 interaction mutants. **(b)** The interaction of  
13 Swi5-Sfr1 (S5S1, wild type or mutants) with Rad51 was investigated by a pull-down assay.  
14 Affi-BSA is a control for nonspecific binding. **(c)** Three-strand exchange reactions were  
15 performed with the indicated concentrations of Swi5-Sfr1 (wild type or mutants). The  
16 percentage of DNA signal per lane corresponding to total yield **(d)**, JM **(e)** or NC **(f)** was plotted  
17 against Swi5-Sfr1 concentration. For **(d-f)**, mean values of three independent experiments  $\pm$   
18 s.d. are shown.

19

20 **Figure 6.** Rad51 filament stabilization and ATPase stimulation requires interactions with Sites  
21 1 and 2.

22 **(a)** Schematic of the fluorescence anisotropy assay. Rad51 monomers (white circles) are  
23 depicted forming a filament on an oligonucleotide (black line) labeled with the TAMRA  
24 fluorophore (orange star). **(b-e)** The anisotropy of fluorescently labelled ssDNA in complex  
25 with Rad51 was monitored following induction of filament collapse in the presence of Swi5-  
26 Sfr1 (wild type or mutants) at the indicated concentrations ( $\mu\text{M}$ ). **(f)**  $k_{off}$  values were  
27 determined for Rad51-ssDNA complexes at the indicated concentrations of Swi5-Sfr1. **(g)**

1 Rad51-dependent ATP turnover was determined in the presence of the indicated Swi5-Sfr1  
2 variant. For **(f,g)**, mean values of three independent experiments  $\pm$  s.d. are shown.

3

4 **Figure 7.** Rad55-Rad57 facilitates Swi5-Sfr1-dependent DNA repair

5 **(a,c)** 10-fold serial dilutions of the indicated strains were spotted onto rich media with or  
6 without acute UV treatment and grown at 30°C. **(b,d)** Percentage of cell survival was  
7 determined after acute exposure to UV. **(e)** Molecular bridging model. Rad51 monomers  
8 (white circles) are shown as a filament on ssDNA (solid black lines). Dashed black lines  
9 represent physical interactions with line thickness portraying interaction strength. Dashed grey  
10 lines represent potential physical interactions. Swi5-Sfr1 is recruited to Rad51 via two  
11 redundant mechanisms, one requiring its direct interaction with Rad51 and the other requiring  
12 Rad55-Rad57. See Discussion for details. For **(b,d)**, mean values of three independent  
13 experiments  $\pm$  s.d. are shown. For **(b)**, statistical analysis was by one-way ANOVA followed  
14 by Tukey's multiple comparisons test. \*,  $P < 0.05$ . n.s., not significant ( $P > 0.05$ ).

## 1 **ONLINE METHODS**

### 2 **METHOD DETAILS**

#### 3 ***S. pombe* and *E. coli* strains**

4 The genotypes of *S. pombe* strains used in this study are listed in Table S1. Standard media  
5 was used for growth (YES), selection (YES with drugs or EMM), and sporulation (SPA), as  
6 described previously<sup>60</sup>. The genotypes of *E. coli* strains used in this study are listed in Table  
7 S2. Standard media was used for growth (LB) and selection (LB with antibiotics), unless  
8 otherwise indicated. All strains employed in this study are available upon reasonable request  
9 to the corresponding author (HI).

10

#### 11 **DNA damage sensitivity**

12 A single colony was resuspended in 2 mL of YES and grown for 24 h (*rad*<sup>+</sup>) or 48h (*rad*<sup>-</sup>). Cells  
13 from these cultures were then seeded into 2 mL of fresh YES and grown for ~14 h until they  
14 reached log phase (~0.8 x10<sup>7</sup> cells/mL). Cell density was adjusted to 2 x 10<sup>7</sup> cells/mL, 10-fold  
15 serial dilutions were made, and 5 µL of each dilution was spotted onto YES plates (no  
16 treatment control) or YES plates containing the indicated genotoxins. In the case of UV  
17 irradiation, cells were spotted onto YES without any drug and treated with acute UV exposure  
18 of the indicated dose. The leftmost spot on each plate contains 1 x 10<sup>5</sup> cells. Cells were  
19 photographed with a digital camera after the indicated growth period (2-4 days). For  
20 clonogenic assays, cells were grown as described above and spread onto several YES plates  
21 and irradiated with the indicated dose of UV. After 3 (*rad*<sup>+</sup>) or 4 (*rad*<sup>-</sup>) days of growth, colonies  
22 were counted.

23

#### 24 **Extraction of cellular proteins for immunoblotting**

25 Cells (1 x 10<sup>8</sup>) were harvested and processed exactly as previously described<sup>61</sup>. Briefly,  
26 harvested cells were resuspended in 1mL of ice-cold water. 150µL of lysing solution (1.85 M  
27 NaOH 7.5% beta-mercaptoethanol) was added and mixed with the cells, followed by a 15 min  
28 incubation on ice. 150µL of 55% TCA was added, followed by a further 10 min incubation on

1 ice. Precipitated proteins were pelleted by centrifugation (16,000 *g* 10 min 4°C) and dissolved  
2 with mixing (65°C 10 min) in 100 µL of urea loading buffer (8 M urea, 5% SDS, 200 mM Tris-  
3 Cl pH 6.8, 1 mM EDTA, 0.01% BPB, freshly supplemented with 10% volume each of 1 M DTT  
4 and 2 M Tris). Proteins were separated by SDS-PAGE, transferred to PVDF membranes, and  
5 detected with the indicated antibodies.

6

## 7 **CD spectrometry**

8 CD measurements were made using a Jasco J-720W spectrometer with a Peltier temperature  
9 controller. Sfr1N (4µM) in buffer N (20 mM sodium phosphate [pH 6], 25 mM NaCl, 1 mM DTT)  
10 was placed in a 0.1 cm path length quartz cuvette. The CD spectrum was acquired from 180  
11 nm to 260 nm at 25 °C with a 1.0 nm bandwidth, 0.5 nm resolution, 50 nm/min scan speed,  
12 with 1 s averaging at each wavelength. Three spectra were averaged to give the spectrum of  
13 the protein and blank spectrum measured for buffer N alone was subtracted to produce the  
14 final spectrum.

15

## 16 **NMR analysis of Sfr1N**

17 Sfr1N (residues 1-176) was subcloned into pBKN220<sup>20</sup>, which was transformed into the *E. coli*  
18 strain BL21 (DE3) RIPL. Plasmids containing Sfr1N variants were prepared by using the  
19 protocol in the QuikChange Site-Directed Mutagenesis Kit (Agilent).

20 For the production of uniformly <sup>15</sup>N-labeled or <sup>13</sup>C and <sup>15</sup>N-labeled proteins, *E. coli* cells  
21 were grown in M9 media supplemented with <sup>15</sup>NH<sub>4</sub>Cl (1 g/L, Cambridge Isotope Laboratories)  
22 or with <sup>15</sup>NH<sub>4</sub>Cl and <sup>13</sup>C<sub>6</sub>-glucose (3 g/L, SHOKO Science), respectively. For the production  
23 of amino acid selectively labeled proteins, modified M9 media supplemented with a <sup>15</sup>N-  
24 labeled amino acid (either Ala [200 mg/L], Arg [200 mg/L], Ile [100 mg/L], Leu [100 mg/L], Lys  
25 [100 mg/L] or Phe [50 mg/L], all from Cambridge Isotope Laboratories) and other non-labeled  
26 amino acids (400 mg/L Ala, 400 mg/L Arg, 250 mg/L Asp, 50 mg/L Cys, 400 mg/L Glu, 400  
27 mg/L Gly, 100 mg/L His, 100 mg/L Ile, 100 mg/L Leu, 150 mg/L Lys, 50 mg/L Met, 50 mg/L  
28 Phe, 150 mg/L Pro, 1000 mg/L Ser, 100 mg/L Thr, 50 mg/L Trp, 100 mg/L Tyr, and 100 mg/L

1 Val) was used for culturing cells. Cultures were shaken in baffled flasks at 37 °C until the OD<sub>600</sub>  
2 reached 0.8~1.0. Protein expression was then induced by the addition of 0.5 mM isopropyl-β-  
3 D-thiogalactoside (IPTG) for 20 hours at 20 °C. For cultures with labeled amino acids, the  
4 induction was limited to ≤4 hours to minimize isotope scrambling. Sfr1N was then purified as  
5 described<sup>24</sup>, except the storage buffer used was buffer N (20 mM sodium phosphate [pH 6],  
6 25 mM NaCl, 1 mM DTT). A truncated version of Sfr1N (127-176) was purified as a fusion  
7 protein with an N-terminal maltose-binding protein tag. Following purification with amylose  
8 resin (NEB), the tag was cleaved with Factor Xa and the cleaved peptide was isolated by  
9 ultrafiltration (Amicon Ultra-15 MWCO 10K, Merck) and subsequent solid phase extraction  
10 using a Sep-Pak C8 plus short cartridge (Waters).

11 NMR experiments were carried out using Bruker Avance III HD 500 and 800  
12 spectrometers equipped with TCI cryoprobes at 25 °C. The spectra were processed using the  
13 program NMRPipe<sup>62</sup> and analyzed using the program Sparky (Goddard, T. D. and Kneller, D.  
14 G. University of California, San Francisco).

15 For the main-chain resonance assignments of Sfr1N, <sup>13</sup>C and <sup>15</sup>N doubly labeled  
16 samples at concentrations of 0.15~0.20 mM in buffer N mixed with 5% D<sub>2</sub>O were prepared  
17 and placed in 5 mm symmetrical microtubes (Shigemi). The <sup>1</sup>H-<sup>15</sup>N HSQC spectrum<sup>63,64</sup> was  
18 acquired at a <sup>1</sup>H frequency of 800 MHz with a scan number of 8, 1024 complex points and an  
19 acquisition time of 91.8 ms in the observed dimension, and 256 complex points and an  
20 acquisition time of 132 ms in the indirect dimension. The HNCA<sup>65,66</sup>, HN(CO)CA<sup>65,66</sup>,  
21 HNCACB<sup>67</sup>, HN(CO)CACB<sup>68</sup>, HNCO<sup>65,66</sup>, and HN(CA)CO<sup>69</sup> spectra were acquired at 800 MHz  
22 with a scan number of 8. All spectra were acquired with 512 complex points and an acquisition  
23 time of 45.9 m in the observed dimension. In the <sup>15</sup>N dimension, all spectra except HNCACB  
24 were acquired with 45 complex points and an acquisition time of 23.1 ms, while the HNCACB  
25 spectrum was measured with 47 complex points and an acquisition time of 24.1 ms. The  
26 experiments with <sup>13</sup>C<sub>α</sub>, <sup>13</sup>C<sub>α</sub>/<sup>13</sup>C<sub>β</sub>, and <sup>13</sup>CO evolution were acquired with 64, 128, and 43

1 complex points and acquisition times of 13.3, 10.6, and 8.90 ms in the  $^{13}\text{C}$  dimension,  
2 respectively.

3 To verify the signal assignments, the following samples were prepared and their  $^1\text{H}$ -  
4  $^{15}\text{N}$  HSQC spectra were obtained at 500 MHz; amino-acid selectively  $^{15}\text{N}$ -labeled (Ala, Arg,  
5 Ile, Leu, Lys, or Phe) Sfr1N(1-176), Arg-selectively  $^{15}\text{N}$ -labeled R97A variant of Sfr1N(1-176),  
6 Lys-selectively  $^{15}\text{N}$ -labeled K93A variant of Sfr1N(1-176), and uniformly  $^{15}\text{N}$ -labeled Sfr1 (127-  
7 176). From the 160 expected main-chain amide NH signals, 157 were detected (98%) and  
8 assigned to specific residues in Sfr1N. The remaining three signals from Q2, S3, and H51  
9 could not be assigned due to line-broadening. NMR data were deposited in the Biological  
10 Magnetic Resonance Bank (BMRB) repository with accession number 27885.

11

## 12 **Secondary structure analysis**

13 The secondary structural elements were analyzed by calculating deviations of the observed  
14  $^{13}\text{C}_\alpha$ ,  $^{13}\text{C}_\beta$ , and  $^{13}\text{CO}$  chemical shifts from their residue-dependent random coil values<sup>30,70</sup>.  
15 Residues were deemed to form random coils if they displayed secondary chemical shift values  
16 within a limited range (between -0.7 and 0.7 for  $^{13}\text{C}_\alpha$  and  $^{13}\text{C}_\beta$  atoms, and between -0.5 and  
17 0.5 for  $^{13}\text{CO}$  atoms of non-proline residues, and -4 to 4 for all three  $^{13}\text{C}$  atoms of proline  
18 residues). The program TALOS+<sup>31</sup> was also used to predict the secondary structural units  
19 where  $^1\text{H}_\text{N}$ ,  $^{13}\text{C}_\alpha$ ,  $^{13}\text{C}_\beta$ ,  $^{13}\text{CO}$ , and  $^{15}\text{N}_\text{H}$  chemical shifts were used as input data. Predictions of  
20 disorder and protein binding sites for Sfr1 homologs were generated by DISOPRED3<sup>59</sup>.

21

## 22 **Heteronuclear NOE**

23 The heteronuclear  $\{^1\text{H}\}$ - $^{15}\text{N}$  NOE experiment<sup>32</sup> was carried out for uniformly  $^{15}\text{N}$ -labeled Sfr1N  
24 at 800 MHz. The NOE values were determined from the ratio  $I_{\text{NOE}}/I_{\text{ref}}$ , where  $I_{\text{NOE}}$  and  $I_{\text{ref}}$   
25 indicate the signal intensities in the spectra acquired with and without 3 sec  $^1\text{H}$  presaturation,  
26 respectively. The NOE and reference spectra were acquired in an interleaved manner with a  
27 scan number of 32, 1024 complex points and an acquisition time of 91.8 ms in the observed  
28 dimension, and 256 complex points and an acquisition time of 132 ms in the indirect dimension.



1

## 2 **NMR interaction analysis**

3 250  $\mu$ L of uniformly  $^{15}$ N-labeled Sfr1N at a concentration of 0.1 mM in buffer N was mixed with  
4 a 0.1 mM Rad51 solution in buffer N at Sfr1N:Rad51 molar ratios of 1:0, 1:0.25, 1:0.5, 1:0.75,  
5 and 1:1. These Sfr1N-Rad51 mixtures were concentrated to 250  $\mu$ L (Amicon Ultra-4 MWCO  
6 10K, Merck) and used for NMR measurements. For each mixture,  $^1$ H- $^{15}$ N HSQC spectra were  
7 acquired at 500 MHz with a scan number of 16, 1024 complex points and an acquisition time  
8 of 146 ms in the observed dimension, and 256 complex points and an acquisition time of 126  
9 ms in the indirect dimension.

10

## 11 **Site-specific crosslinking**

12 *E. coli* strains used in this study are listed in Supplementary Table S1. Experiments were  
13 performed essentially as described<sup>36</sup>. Co-expression of Sfr1N (1-176, with or without a specific  
14 amber codon) and Rad51 was induced with 1 mM IPTG at an OD<sub>600</sub> of ~0.35 in *E. coli* strain  
15 BL21 (DE3) containing the pEVOL-pBpF plasmid either in the presence or absence of 1 mM  
16 pBPA. After 1 h at 30 °C, cultures were pre-chilled on ice for 5 min before 250  $\mu$ L of cells were  
17 spotted in a radial manner onto petri dishes at 4 °C and UV irradiated for 10 min at a distance  
18 of 4 cm with a B-100 AP UV lamp (365 nm; UVP, LLC). 200  $\mu$ L of cells was recovered from  
19 the plate and pelleted by centrifugation (20,000 g 5 min 4 °C). This pellet was dissolved in 70  
20  $\mu$ L of urea loading buffer<sup>61</sup> and subjected to immunoblotting.

21

## 22 **Purification of proteins for biochemical analyses**

23 Previously published protocols were followed to purify Rad51<sup>21</sup>, RPA<sup>20</sup>, and Swi5-Sfr1 (wild  
24 type<sup>20</sup>, Sfr1N<sup>24</sup>, and Swi5-Sfr1C<sup>24</sup>). Swi5-Sfr1 mutants (3A, 4A, 7A) were purified by the same  
25 method as wild type Swi5-Sfr1 except they were diluted to ~25 mM NaCl instead of ~100 mM  
26 NaCl before being applied to the HiTrap Heparin column. All proteins were free of  
27 contaminating nuclease and ATPase activity for the duration of the relevant assays. In all

1 assays where comparisons were made between reactions with and without protein, the  
2 equivalent volume of protein storage buffer was added instead of the protein.

3

#### 4 **Three-strand exchange assay**

5 Strand exchange buffer (30 mM Tris-Cl [pH 7.5], 100 mM NaCl, 20mM KCl, 3.5 mM MgCl<sub>2</sub>, 2  
6 mM ATP, 1 mM DTT, 5% glycerol, 8 mM phosphocreatine, 8 units/mL creatine  
7 phosphokinase) containing 10 μMnt PhiX174 virion DNA (NEB) was supplemented with 5 μM  
8 Rad51 and incubated at 37 °C for 10 min. The indicated concentration and variant of Swi5-  
9 Sfr1 was then added and the reaction was incubated for 10 min at 37 °C. Next, 1 μM of RPA  
10 was added and the reaction was incubated for 7 min at 37 °C. The reaction was initiated  
11 through the addition of 10 μMnt PhiX RF I DNA (NEB) linearized with ApaI and incubated for  
12 a further 2 h at 37°C. The 10 μL reactions were subjected to psoralen-UV crosslinking to  
13 capture labile DNA structures and 1.95 μL of stop solution was added (30 mM Tris-Cl [pH 7.5],  
14 44 mM EDTA, 3% SDS, 15 mg/mL proteinase K). Following a 15 min incubation at 37 °C, DNA  
15 was resolved in 1% agarose gels and stained with SYBR Gold (Thermo Fisher Scientific).

16

#### 17 **In vitro interaction assay**

18 For the affi-gel interaction assay (Fig. 5B), BSA or Rad51 was covalently attached to Affi-gel  
19 15 (2 μg protein/μL gel) according to the manufacturer's instructions. 2 μg of the indicated  
20 Swi5-Sfr1 variant was diluted into 300 μL of Affi-gel buffer (25 mM HEPES-KOH [pH 7.5],  
21 150mM NaCl, 3.5 mM MgCl<sub>2</sub>, 0.5 mM DTT, 0.05 μg/μL BSA, 10% glycerol, 0.05% igepal CA-  
22 630), input sample was taken, and 140 μL of this solution was mixed with 10 μL of Affi-BSA  
23 or Affi-Rad51. Reactions were then incubated with gentle mixing (30 °C 30 min). Following a  
24 brief centrifugation, flow-through samples were taken and the resin was washed with Affi-gel  
25 buffer (200 μL, x2). Bound proteins were eluted in 50 μL of SDS loading buffer with gentle  
26 mixing (37 °C 15 min). 9 μL (input, flow-through) or 3 μL (eluate) of sample was separated by  
27 SDS-PAGE, proteins were transferred to PVDF membranes and Sfr1 was detected with an  
28 anti-Sfr1 antibody<sup>20</sup>.

1 For the IP experiment in Supplemental Fig. S4C, 250 nM of a Swi5-Sfr1 variant and  
2 250 nM of Rad51 were mixed on ice in 120  $\mu$ L of IP buffer (30 mM Tris-Cl [pH 7.5], 150 mM  
3 NaCl, 3.5 mM MgCl<sub>2</sub>, 5% glycerol, 0.1% Igepal CA-630). Input sample was taken and 100  $\mu$ L  
4 of the solution was incubated at 30 °C for 15 min. Protein A SureBeads (Bio-Rad) preincubated  
5 with anti-Rad51 antibody<sup>20</sup> was added and mixtures were incubated with gentle mixing (4 °C  
6 2 h). Beads were washed with IP buffer (500  $\mu$ L, x3) and bound proteins were eluted in 50  $\mu$ L  
7 of SDS loading buffer with gentle mixing (65 °C 10 min). Proteins were separated by SDS-  
8 PAGE, transferred to PVDF membranes and detected with the indicated antibodies.

9

#### 10 **Antibodies used for IP and immunoblotting**

11 For the immunoblots of site-specific crosslinking experiments: anti-Rad51 (Rb 1:10,000;  
12 provided by Hiroshi Iwasaki); anti-Sfr1 (Rb 1:5,000; provided by Hiroshi Iwasaki). For the  
13 immunoblots of cellular proteins: anti-MYC (Rb 1:1,000; Sigma Aldrich C3956), anti-Rad51  
14 (Rat 1:10,000; provided by Hiroshi Iwasaki), and anti-tubulin (Mu 1:10,000; Sigma Aldrich  
15 T5168). For the detection of Sfr1 in the affi-gel assay: anti-Sfr1 (Rb 1:5,000; provided by  
16 Hiroshi Iwasaki). For IP of Rad51 complexes, anti-Rad51 (Rb; provided by Hiroshi Iwasaki)  
17 was used, and for detection by immunoblotting: anti-Rad51 (Rat 1:10,000; provided by Hiroshi  
18 Iwasaki); anti-Sfr1 (Mu 1:1,000; provided by Hiroshi Iwasaki). Antibodies raised by our lab are  
19 available upon reasonable request to the corresponding author (HI).

20

#### 21 **Analysis of Rad51 filament dissociation kinetics**

22 Anisotropy buffer (30 mM HEPES-KOH [pH 7.5], 100 mM KCl, 10 mM NaCl, 3 mM MgCl<sub>2</sub>, 1  
23 mM ATP, 1 mM DTT, 5% glycerol) containing 1.5  $\mu$ M of oligo dT (72 mer) with a 5' TAMRA  
24 label was supplemented with 0.5  $\mu$ M Rad51 and incubated at 25 °C for 5 min. Next, a Swi5-  
25 Sfr1 variant was added at the indicated concentration and the reaction was incubated at 25  
26 °C for a further 5 min. This solution was transferred into a 0.3 x 0.3 cm quartz cuvette and the  
27 fluorescence anisotropy was monitored once per second for 60 seconds (25 °C, excitation 564  
28 nm, emission 575 nm) to confirm filament formation. Next, a 1.0 x 1.0 cm quartz cuvette

1 containing 2 mL of anisotropy buffer was placed into the spectrofluorometer with constant  
2 stirring (450 r.p.m) and, after 60 s of measurement, 50  $\mu$ L of the solution containing Rad51  
3 filaments with or without Swi5-Sfr1 was injected into this cuvette. Fluorescence anisotropy  
4 was then monitored once per second for the indicated time. Dissociation rate constants ( $k_{off}$ )  
5 were calculated in KaleidaGraph. Cuvettes were purchased from Hellma Analytics.

6

## 7 **ATPase assay**

8 ATPase buffer (30 mM Tris-Cl [pH 7.5], 100 mM KCl, 20 mM NaCl, 3.5 mM MgCl<sub>2</sub>, 5% glycerol)  
9 containing 10  $\mu$ Mnt PhiX virion DNA was mixed on ice with 5  $\mu$ M Rad51 and 0.25  $\mu$ M of a  
10 Swi5-Sfr1 variant. Reactions were initiated through the addition of 0.5 mM ATP. Time zero  
11 was immediately withdrawn (10  $\mu$ L) and mixed with 2  $\mu$ L of 120 mM EDTA to terminate the  
12 reaction. Following incubation at 37 °C, aliquots were withdrawn at the indicated timepoints  
13 and processed as above. Upon completion of the time course, aliquots were diluted two-fold  
14 with water to reduce the concentration of ATP to 0.25 mM. Inorganic phosphate generated by  
15 ATP hydrolysis was then detected using a commercial malachite green phosphate detection  
16 kit (BioAssay Systems).

17

## 18 **QUANTIFICATION AND STATISTICAL ANALYSIS**

### 19 **DNA damage sensitivity assay**

20 For the clonogenic survival assay, colonies were counted after 3 ( $rad^+$ ) or 4 ( $rad^-$ ) days of  
21 growth. The percentage of survival on the control plate (no UV treatment) was set to 100%.  
22 The expected number of colonies, based on the increased number of cells plated, was  
23 determined for the plates irradiated with the indicated dose of UV. The number of actual  
24 colonies was expressed as a fraction of the expected number, yielding the percentage of cells  
25 that survived the treatment. The values from three independent experiments were averaged  
26 and plotted, with the standard deviation of these averaged values depicted by error bars. In  
27 Fig. 7b, a one-way ANOVA followed by Tukey's multiple comparisons test was performed. \*,

- 1  $P < 0.05$ , n.s., not significant ( $P > 0.05$ ). Further statistical information for Fig. 7b is listed below.  
 2 Raw data is available upon reasonable request from the corresponding author (HI).

| Tukey's multiple comparisons test | Mean Diff. | 95.00% CI of diff. | Significant? | Summary | Adjusted P Value |
|-----------------------------------|------------|--------------------|--------------|---------|------------------|
| <i>WT</i> vs. <i>sfr1d</i>        | 23.8       | 13.4 to 34.21      | Yes          | **      | 0.001            |
| <i>WT</i> vs. <i>7A</i>           | 10.16      | -0.2475 to 20.57   | No           | ns      | 0.0547           |
| <i>sfr1d</i> vs. <i>7A</i>        | -13.64     | -24.05 to -3.234   | Yes          | *       | 0.0163           |

3

| Test details               | Mean 1 | Mean 2 | Mean Diff. | SE of diff. | n1 | n2 | q    | DF |
|----------------------------|--------|--------|------------|-------------|----|----|------|----|
| <i>WT</i> vs. <i>sfr1d</i> | 25.14  | 1.337  | 23.8       | 3.392       | 3  | 3  | 9.92 | 6  |
| <i>WT</i> vs. <i>7A</i>    | 25.14  | 14.98  | 10.16      | 3.392       | 3  | 3  | 4.24 | 6  |
| <i>sfr1d</i> vs. <i>7A</i> | 1.337  | 14.98  | -13.64     | 3.392       | 3  | 3  | 5.69 | 6  |

4

### 5 **Three-strand exchange assay**

6 Following staining with SYBR Gold (Thermo Fisher Scientific), gels were imaged using a  
 7 LAS4000 mini (GE Healthcare). Densitometric analysis was performed using Multi Gauge  
 8 software (version 3.2, Fujifilm) exactly as described<sup>20,21</sup>. Background signal above the Ids, NC  
 9 and JM bands was subtracted from the corresponding values. The JM value was divided by  
 10 1.5 to compensate for the extra signal generated by these three-stranded DNA molecules.  
 11 The sum of the values was set to 100%, and the percentage of total DNA corresponding to  
 12 NC or JM was calculated. For the total yield, the percentage of DNA corresponding to NC and  
 13 JM was combined. The values from three independent experiments were averaged and  
 14 plotted, with the standard deviation of these averaged values depicted by error bars. Raw data  
 15 is available upon reasonable request from the corresponding author (HI)

16

### 17 **Analysis of Rad51 filament dissociation kinetics**

18 To set a consistent end-point for the anisotropy graphs (Supplemental Fig. S4D-G), data were  
 19 portrayed for the reactions until they reached a moving average (20 datapoints) of 0.106,  
 20 which is equivalent to the value observed for DNA only. Dissociation rate constants ( $k_{off}$ ) were  
 21 calculated in KaleidaGraph using the following equation:

1 Anisotropy = (Amplitude of change in anisotropy) x  $e^{(-k_{off} \times t)}$  + (Minimum value of anisotropy)  
2  $k_{off}$  values from three independent experiments were averaged and plotted, with the standard  
3 deviation of these averaged values depicted by error bars. Raw data is available upon  
4 reasonable request from the corresponding author (HI)

5

## 6 **ATPase assay**

7 Absorbance values at 620 nm ( $A_{620}$ ) were obtained using a Nanodrop spectrophotometer  
8 (Thermo Fisher Scientific).  $A_{620}$  at time zero was subtracted from each value and these values  
9 were converted to concentrations of inorganic phosphate through the use of a standard curve.  
10 Graphs were plotted with inorganic phosphate concentration ( $\mu\text{M}$ ) on the y-axis and time (min)  
11 on the x-axis. The gradient of the line of best fit was divided by the concentration of Rad51 to  
12 yield  $k_{cat}$  values.  $k_{cat}$  values from three independent experiments were averaged and plotted,  
13 with the standard deviation of these averaged values depicted by error bars. Raw data is  
14 available upon reasonable request from the corresponding author (HI).

## 1 REFERENCES

- 2 60. Hentges, P., Van Driessche, B., Tafforeau, L., Vandenhaute, J. & Carr, A. M. Three novel  
3 antibiotic marker cassettes for gene disruption and marker switching in  
4 *Schizosaccharomyces pombe*. *Yeast* **22**, 1013–1019 (2005).
- 5 61. Argunhan, B. *et al.* Fundamental cell cycle kinases collaborate to ensure timely  
6 destruction of the synaptonemal complex during meiosis. *EMBO J.* **36**, 2488–2509 (2017).
- 7 62. Delaglio, F. *et al.* NMRPipe: A multidimensional spectral processing system based on  
8 UNIX pipes. *J. Biomol. NMR* **6**, 277-293 (1995)
- 9 63. Kay, L., Keifer, P., and Saarinen, T. Pure absorption gradient enhanced heteronuclear  
10 single quantum correlation spectroscopy with improved sensitivity. *J. Am. Chem. Soc.*  
11 **114**, 10663-10665 (1992)
- 12 64. Grzesiek, S., and Bax, A. The importance of not saturating water in protein NMR.  
13 Application to sensitivity enhancement and NOE measurements. *J. Am. Chem. Soc.* **115**,  
14 12593-12594 (1993)
- 15 65. Grzesiek, S., and Bax, A. Improved 3D triple-resonance NMR techniques applied to a 31  
16 kDa protein. *J. Magn. Reson.* **96**, 432-440 (1992)
- 17 66. Kay, L. E., Xu, G. Y., and Yamazaki, T. Enhanced-Sensitivity Triple-Resonance  
18 Spectroscopy with Minimal H<sub>2</sub>O Saturation. *J. Magn. Reson. Ser. A* **109**, 129-133 (1994)
- 19 67. Muhandiram, D. R., and Kay, L. E. Gradient-Enhanced Triple-Resonance Three-  
20 Dimensional NMR Experiments with Improved Sensitivity. *J. Magn. Reson. Ser. B* **103**,  
21 203-216 (1994)
- 22 68. Yamazaki, T., Lee, W., Arrowsmith, C. H., Muhandiram, D. R., and Kay, L. E. A Suite of  
23 Triple Resonance NMR Experiments for the Backbone Assignment of <sup>15</sup>N, <sup>13</sup>C, <sup>2</sup>H  
24 Labeled Proteins with High Sensitivity. *J. Am. Chem. Soc.* **116**, 11655-11666 (1994)
- 25 69. Werner-Allen, J. W., Jiang, L., and Zhou, P. A 'just-in-time' HN(CA)CO experiment for the  
26 backbone assignment of large proteins with high sensitivity. *J. Magn. Reson.* **181**, 177-  
27 180 (2006)

- 1 70. Wishart, D. S., Bigam, C. G., Holm, A., Hodges, R. S., and Sykes, B. D.  $^1\text{H}$ ,  $^{13}\text{C}$  and  $^{15}\text{N}$
- 2 random coil NMR chemical shifts of the common amino acids. I. Investigations of nearest-
- 3 neighbor effects. *J. Biomol. NMR.* **5**, 67-81 (1995)



**a**

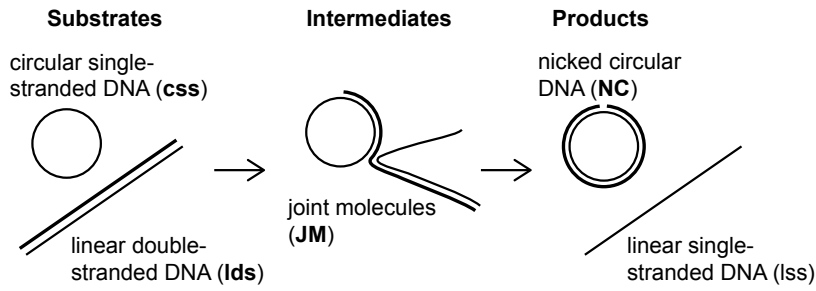

**b**

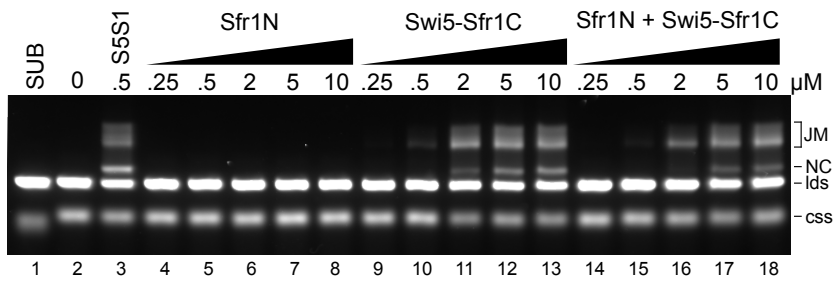

**c**

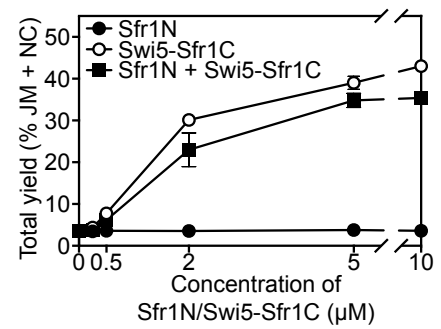

**d**

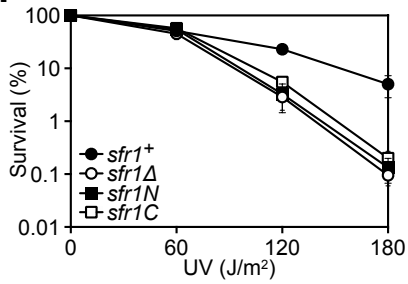

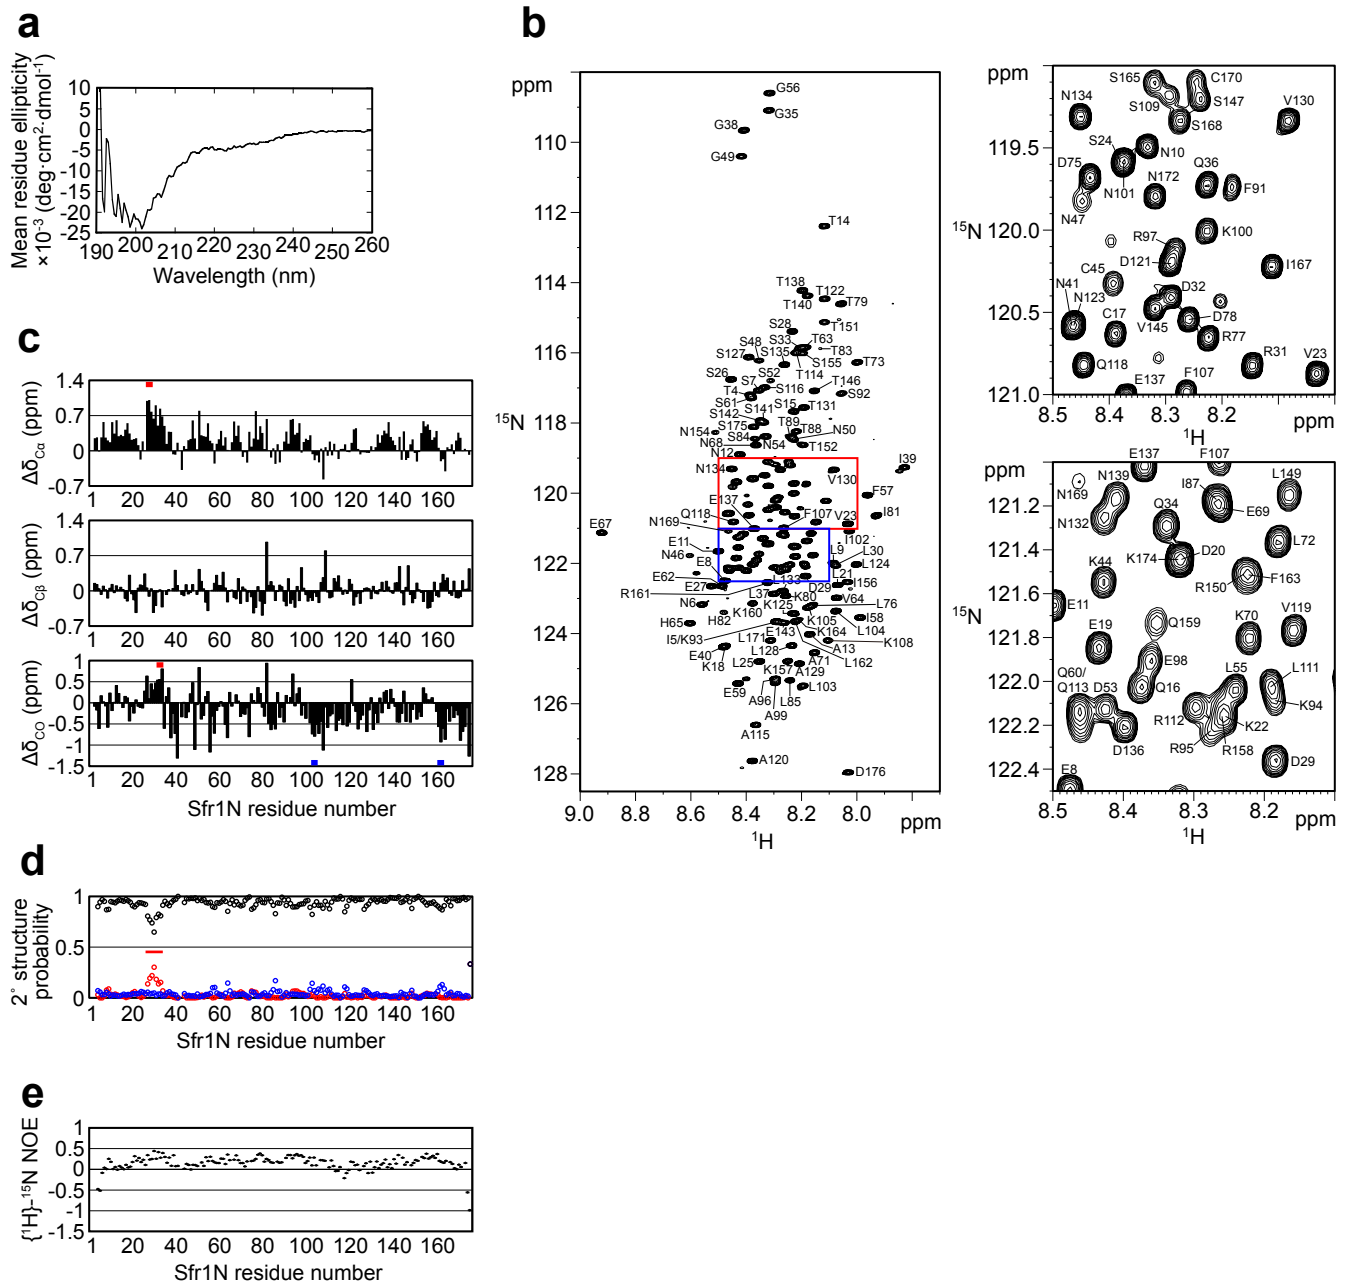

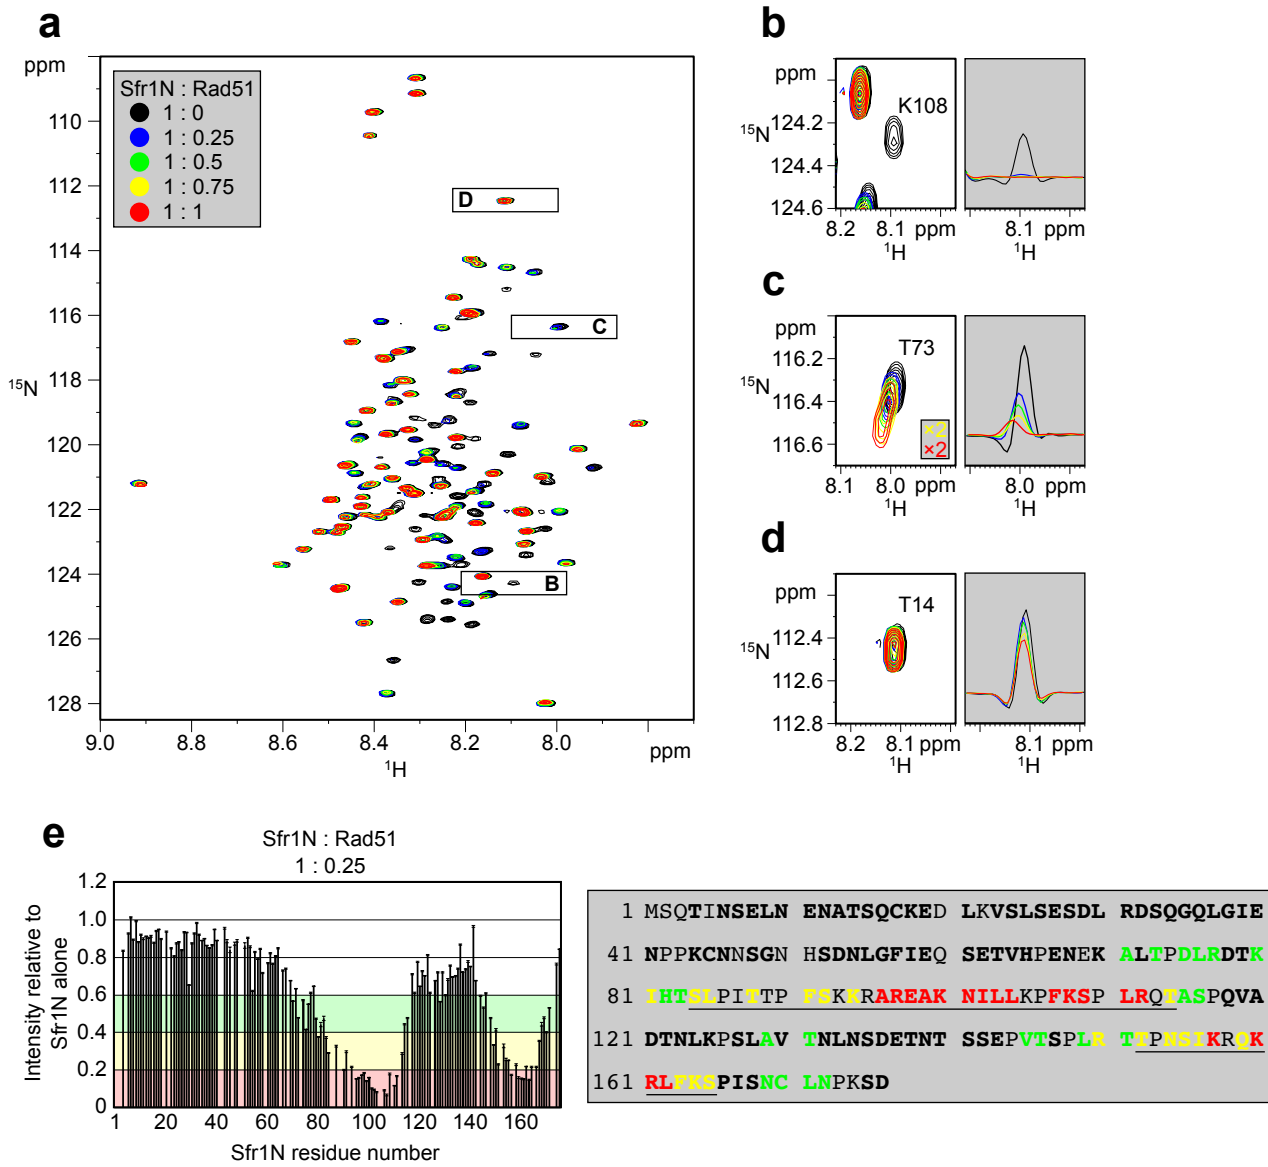

**a**

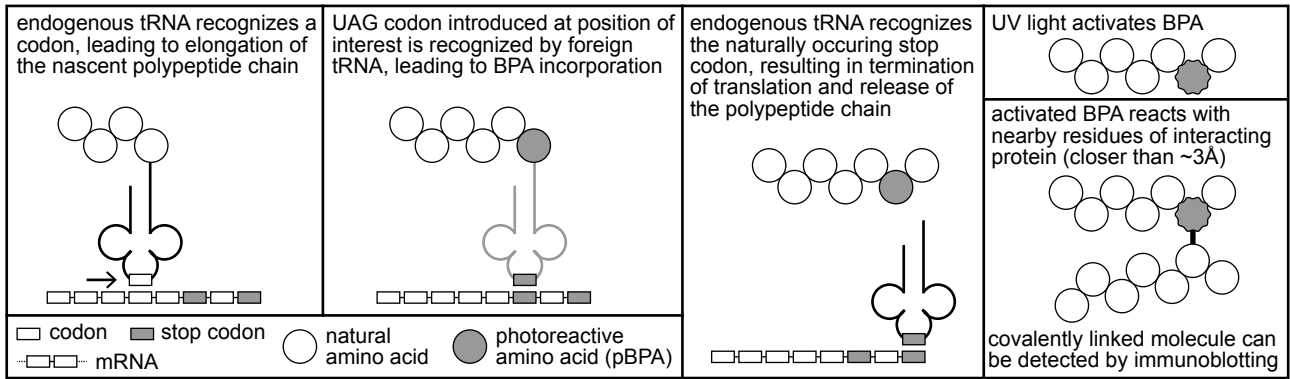

**b**

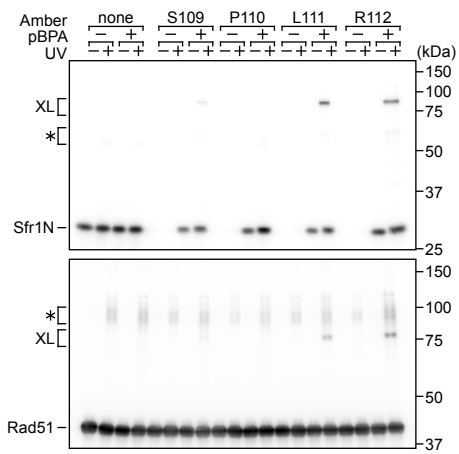

**c**

|                                                                                                                                                                                                                              |                                                                                                            |
|------------------------------------------------------------------------------------------------------------------------------------------------------------------------------------------------------------------------------|------------------------------------------------------------------------------------------------------------|
| Site 1<br>K93 +<br>K94 ++<br>R95 +<br>A96 ++<br>R97 ++<br>E98 ++<br>A99 -<br>K100 ++<br>N101 +<br>I102 ++<br>L103 ++<br>L104 ++<br>K105 -<br>P106 -<br>F107 -<br>K108 +<br>S109 ++<br>P110 -<br>L111 ++<br>R112 ++<br>Q113 + | Site 2<br>K157 -<br>R158 -<br>Q159 -<br>K160 -<br>R161 -<br>L162 +<br>F163 -<br>K164 -<br>S165 -<br>P166 - |
|------------------------------------------------------------------------------------------------------------------------------------------------------------------------------------------------------------------------------|------------------------------------------------------------------------------------------------------------|

|    |                                            |
|----|--------------------------------------------|
| -  | no ~75kD band                              |
| +  | ~75kD band detectable with overexposure    |
| ++ | ~75kD band detectable without overexposure |

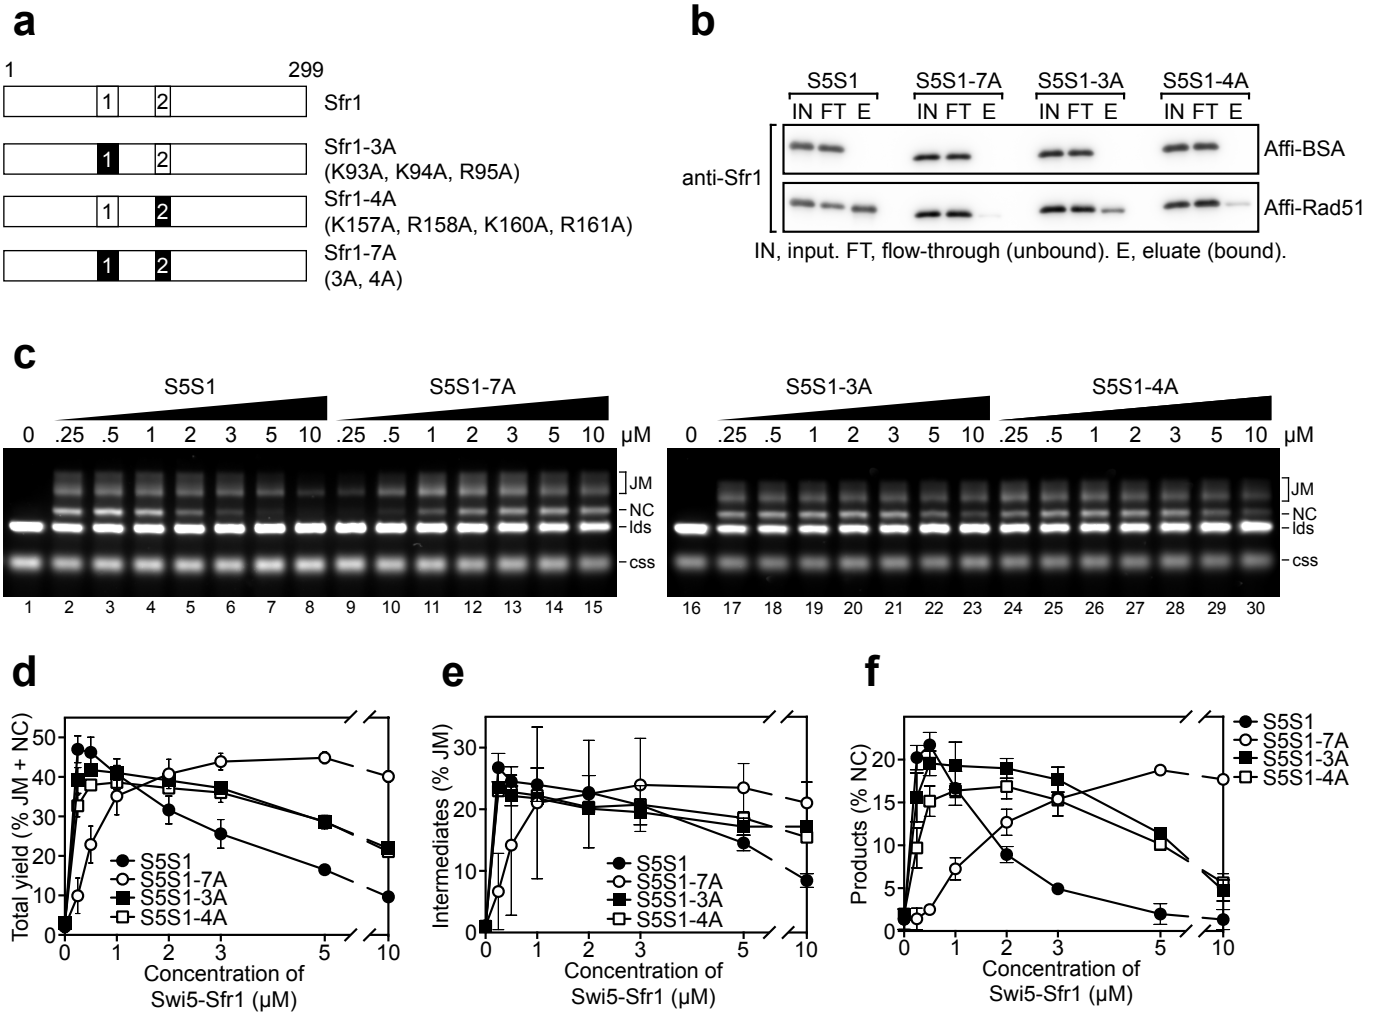

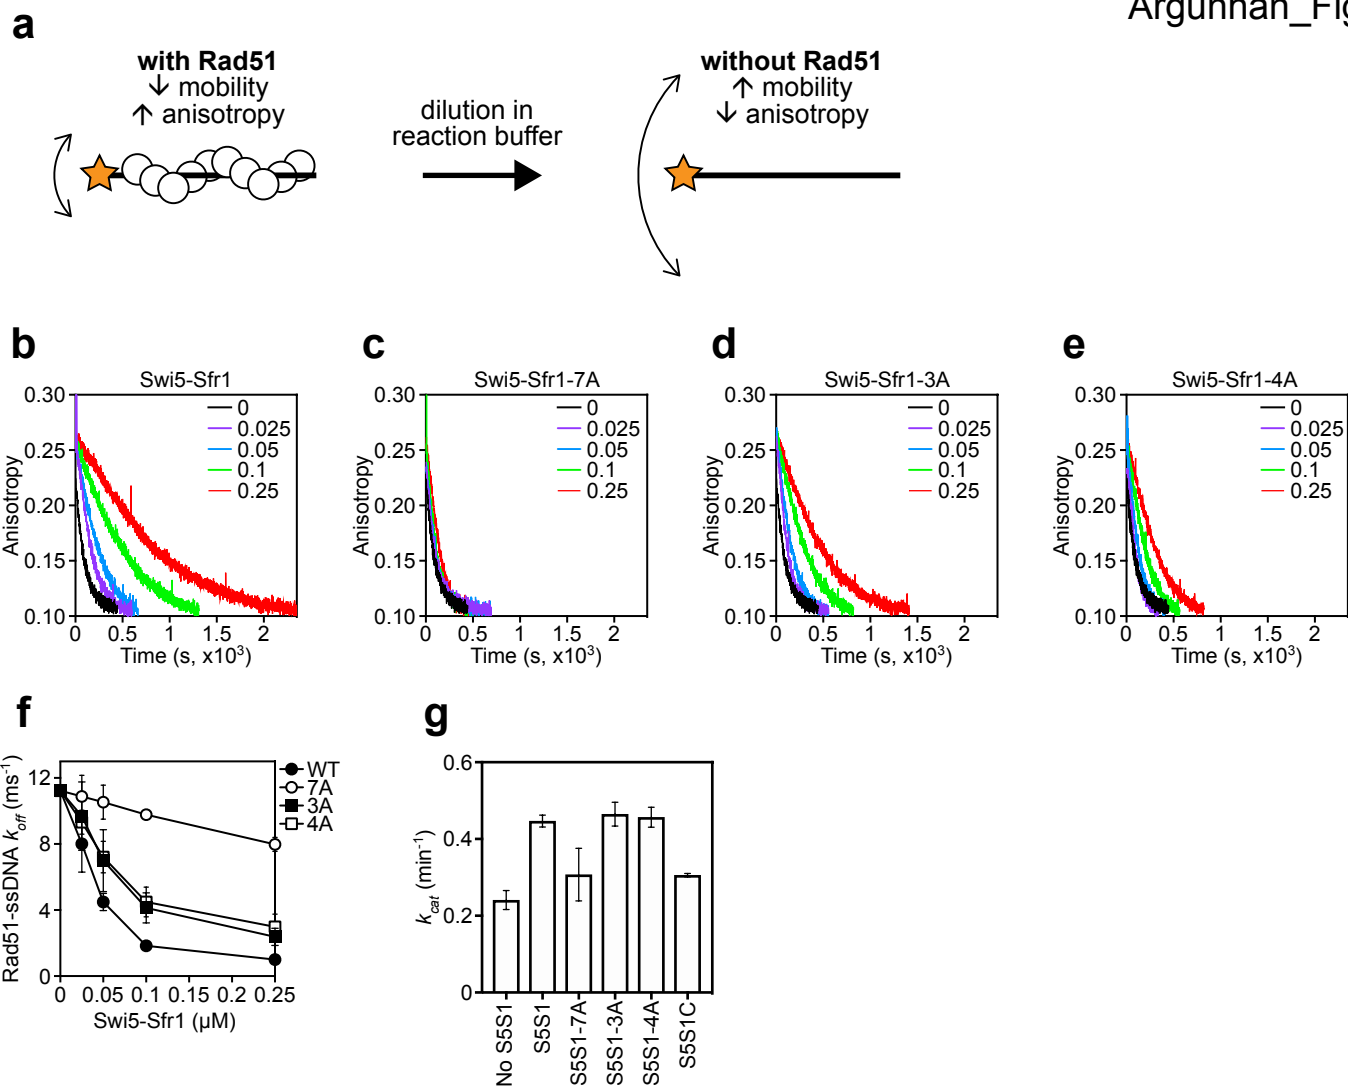

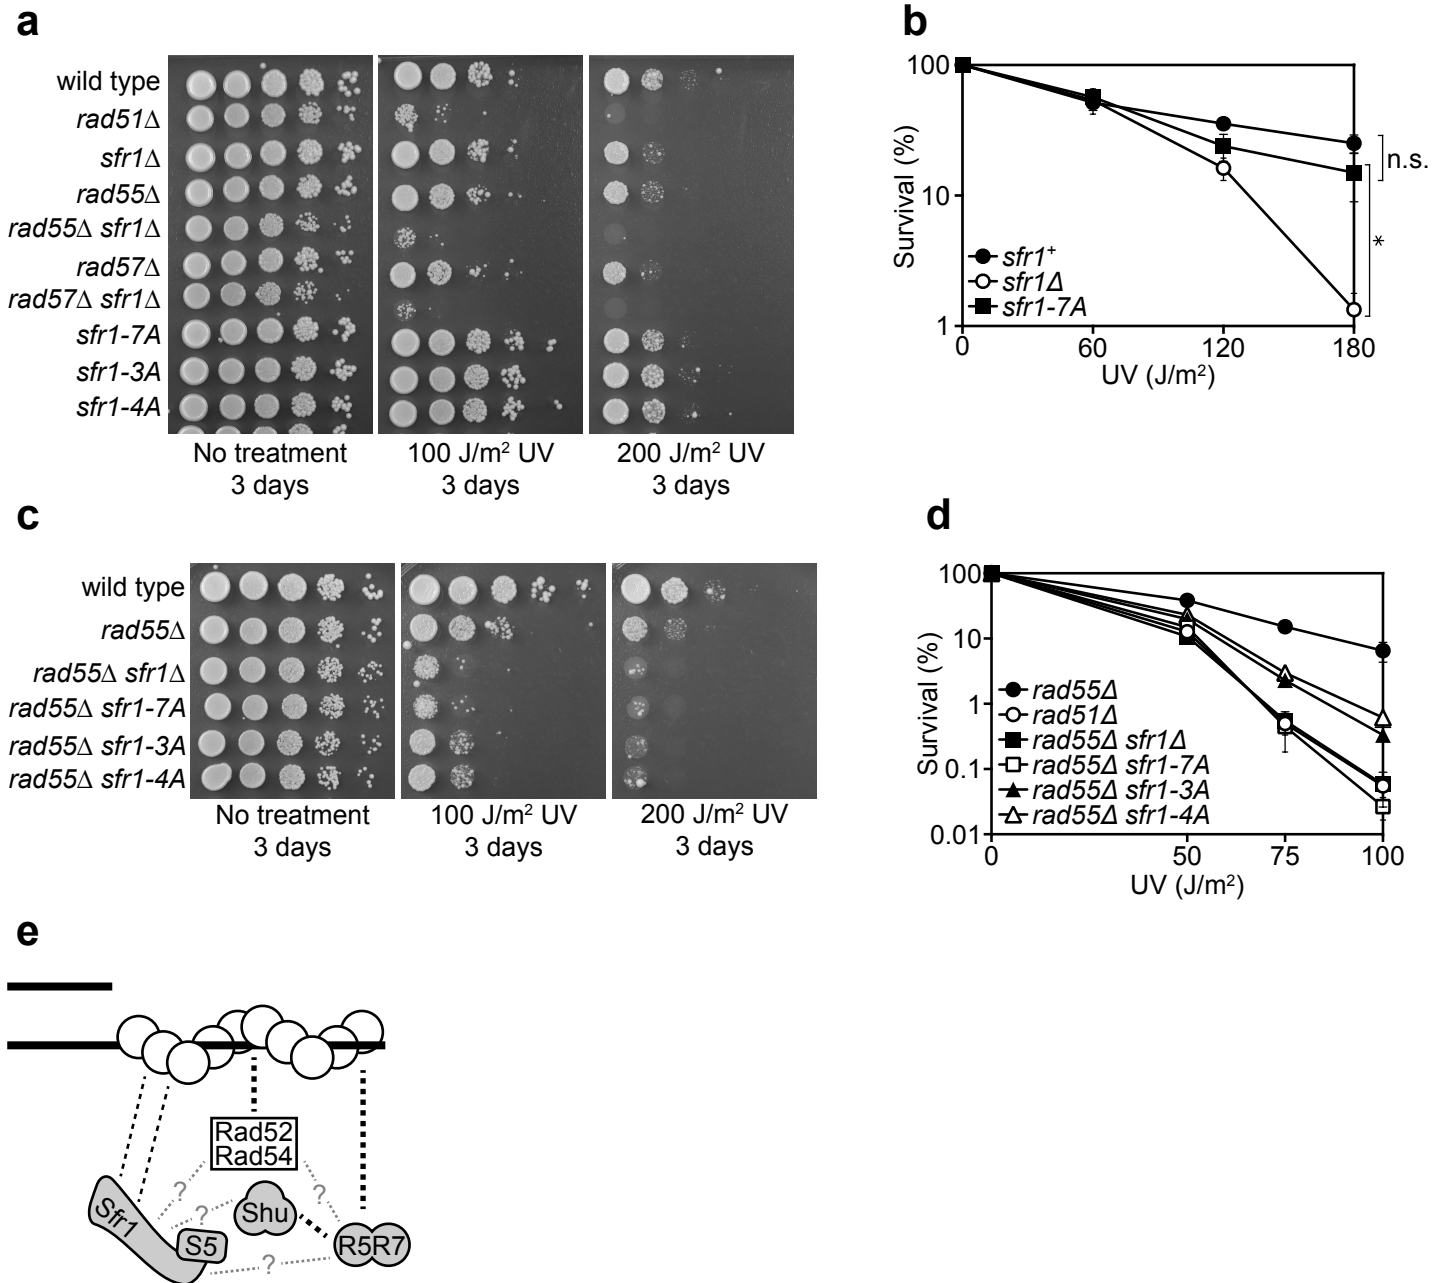

## SUPPLEMENTARY INFORMATION

### Supplementary Table 1

Genotypes of *S. pombe* strains are listed in the table below. All strains are isogenic derivatives of strain YA119 (Akamatsu et al. 2003) and are in the following genetic background:

*Msm1-0 leu-1-32 ura4-D18 his3-D1 arg3-D1*

| Name  | Genotype                                    | Source               |
|-------|---------------------------------------------|----------------------|
| BA9   | <i>sfr1-3A</i>                              | This work            |
| BA10  | <i>sfr1-4A</i>                              | This work            |
| BA12  | <i>sfr1-7A</i>                              | This work            |
| BA29  | <i>rad51::his3<sup>+</sup></i>              | Tsutsui et al. 2000  |
| BA31  | <i>rad57::arg3<sup>+</sup></i>              | Hiroshi Iwasaki      |
| BA51  | <i>rad55::arg3<sup>+</sup></i>              | Tsutsui et al. 2001  |
| BA53  | Wild type                                   | Akamatsu et al. 2003 |
| BA109 | <i>rad55::arg3<sup>+</sup> sfr1-7A</i>      | This work            |
| BA111 | <i>rad57::arg3<sup>+</sup> sfr1-7A</i>      | This work            |
| BA116 | <i>rad57::arg3<sup>+</sup> sfr1-3A</i>      | This work            |
| BA118 | <i>rad55::arg3<sup>+</sup> sfr1-4A</i>      | This work            |
| BA120 | <i>rad57::arg3<sup>+</sup> sfr1-4A</i>      | This work            |
| BA122 | <i>rad55::arg3<sup>+</sup> sfr1-3A</i>      | This work            |
| BA125 | <i>sfr1::kanMX6</i>                         | This work            |
| BA126 | <i>rad55::arg3<sup>+</sup> sfr1::kanMX6</i> | This work            |
| BA130 | <i>rad57::arg3<sup>+</sup> sfr1::kanMX6</i> | This work            |
| BA150 | <i>rad55::natMX6</i>                        | This work            |
| BA166 | <i>sfr1N</i>                                | This work            |
| BA168 | <i>sfr1C</i>                                | This work            |
| BA178 | <i>rad55::natMX6 sfr1N</i>                  | This work            |
| BA182 | <i>rad55::natMX6 sfr1C</i>                  | This work            |
| BA204 | <i>7MYC-sfr1-kanMX6</i>                     | This work            |
| BA244 | <i>7MYC-sfr1-7A-kanMX6</i>                  | This work            |
| BA310 | <i>NLS-sfr1N-kanMX6</i>                     | This work            |
| BA311 | <i>NLS-sfr1C-kanMX6</i>                     | This work            |
| BA314 | <i>7MYC-sfr1N-kanMX6</i>                    | This work            |
| BA316 | <i>7MYC-sfr1C-kanMX6</i>                    | This work            |

### Supplementary Table 2

*E. coli* strains were constructed by transforming BL21 (DE3) containing the pEVOL-pBpF plasmid (Young et al. 2009) with a pBKN220 plasmid encoding Sfr1N (with or without a TAG mutation) and a pET28a plasmid encoding Rad51 (pBA33). Thus, strains only differ in the



expression of Sfr1N or Rad51 and only these differences are indicated in the table below. A “-” sign indicates that cells were transformed with an empty vector whereas a “+” sign signals the presence of Sfr1N or Rad51 on that vector. If a codon in Sfr1N was mutated to TAG, the mutated residue is listed instead of a “+” sign. Strains are listed in order of appearance.

| <b>Name</b> | <b>Sfr1N / Rad51</b> |
|-------------|----------------------|
| BA009       | - / +                |
| BA0058      | - / -                |
| BA0060      | + / -                |
| BA0011      | + / +                |
| BA0013      | K93 / +              |
| BA0015      | K94 / +              |
| BA0017      | R95 / +              |
| BA0019      | A96 / +              |
| BA0021      | R97 / +              |
| BA0023      | E98 / +              |
| BA0025      | A99 / +              |
| BA0027      | K100 / +             |
| BA0029      | N101 / +             |
| BA0031      | I102 / +             |
| BA0033      | L103 / +             |
| BA0035      | L104 / +             |
| BA0037      | K105 / +             |
| BA0039      | P106 / +             |
| BA0044      | F107 / +             |
| BA0046      | K108 / +             |
| BA0048      | S109 / +             |
| BA0050      | P110 / +             |
| BA0052      | L111 / +             |
| BA0054      | R112 / +             |
| BA0056      | Q113 / +             |
| BA0062      | K157 / +             |
| BA0064      | R158 / +             |
| BA0066      | Q159 / +             |
| BA0068      | K160 / +             |
| BA0070      | R161 / +             |
| BA0072      | L162 / +             |
| BA0074      | F163 / +             |
| BA0076      | K164 / +             |
| BA0078      | S165 / +             |
| BA0080      | P166 / +             |

## SUPPLEMENTARY FIGURES

**Supplementary Figure 1.** Sfr1N is essential for Swi5-Sfr1-dependent DNA repair.

**(a,c)** DNA damage sensitivity of the indicated strains was assessed. NLS, nuclear localization signal of the SV40 large T antigen. Bleo., bleomycin. HU, hydroxyurea. Note that *sfr1* $\Delta$  does not sensitize cells to the indicated doses of bleo. or HU unless Rad55-Rad57 is absent. **(b)** Proteins were extracted from log phase cultures, separated by SDS-PAGE and probed with the indicated antibodies. Tubulin serves as a loading control.

**a**

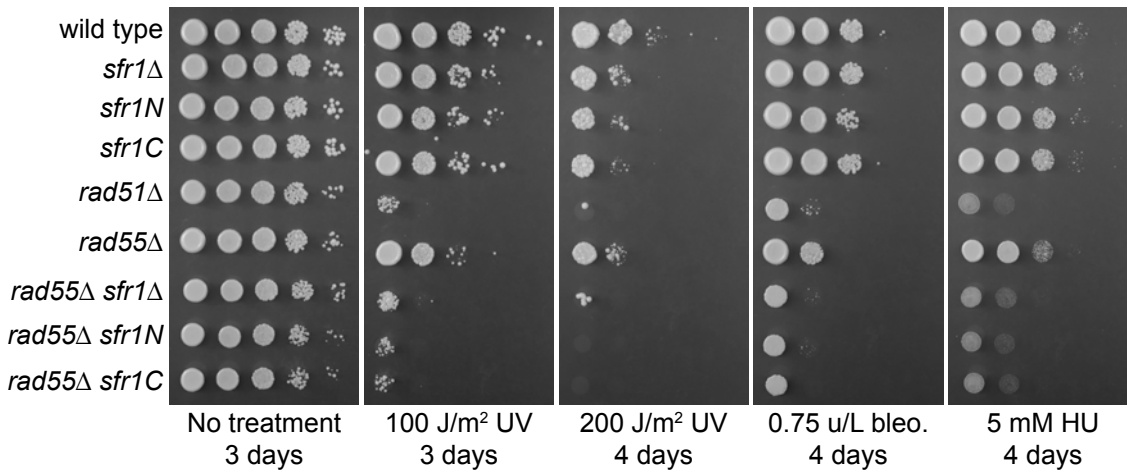

**b**

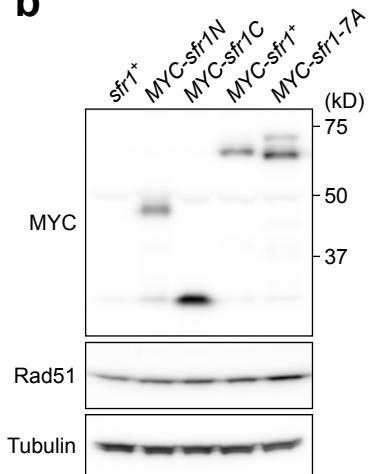

**c**

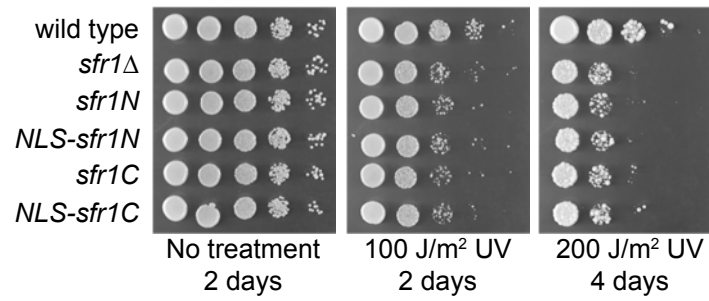

**Supplementary Figure 2.** Validation of Sfr1N signals by  $^{15}\text{N}$  labelling.

**(a)** Superimposed  $^1\text{H}$ - $^{15}\text{N}$  HSQC spectra of Sfr1N with the indicated  $^{15}\text{N}$ -labelling. **(b)**

Superimposed  $^1\text{H}$ - $^{15}\text{N}$  HSQC spectra of uniformly  $^{15}\text{N}$ -labeled Sfr1N and a truncated variant,

Sfr1 (127-176). **(c)** Left, superimposed  $^1\text{H}$ - $^{15}\text{N}$  HSQC spectra of Arg-selectively  $^{15}\text{N}$ -labeled

Sfr1N or Sfr1N-R97A. Right, superimposed  $^1\text{H}$ - $^{15}\text{N}$  HSQC spectra of Lys-selectively  $^{15}\text{N}$ -

labeled Sfr1N or Sfr1N-K94A.

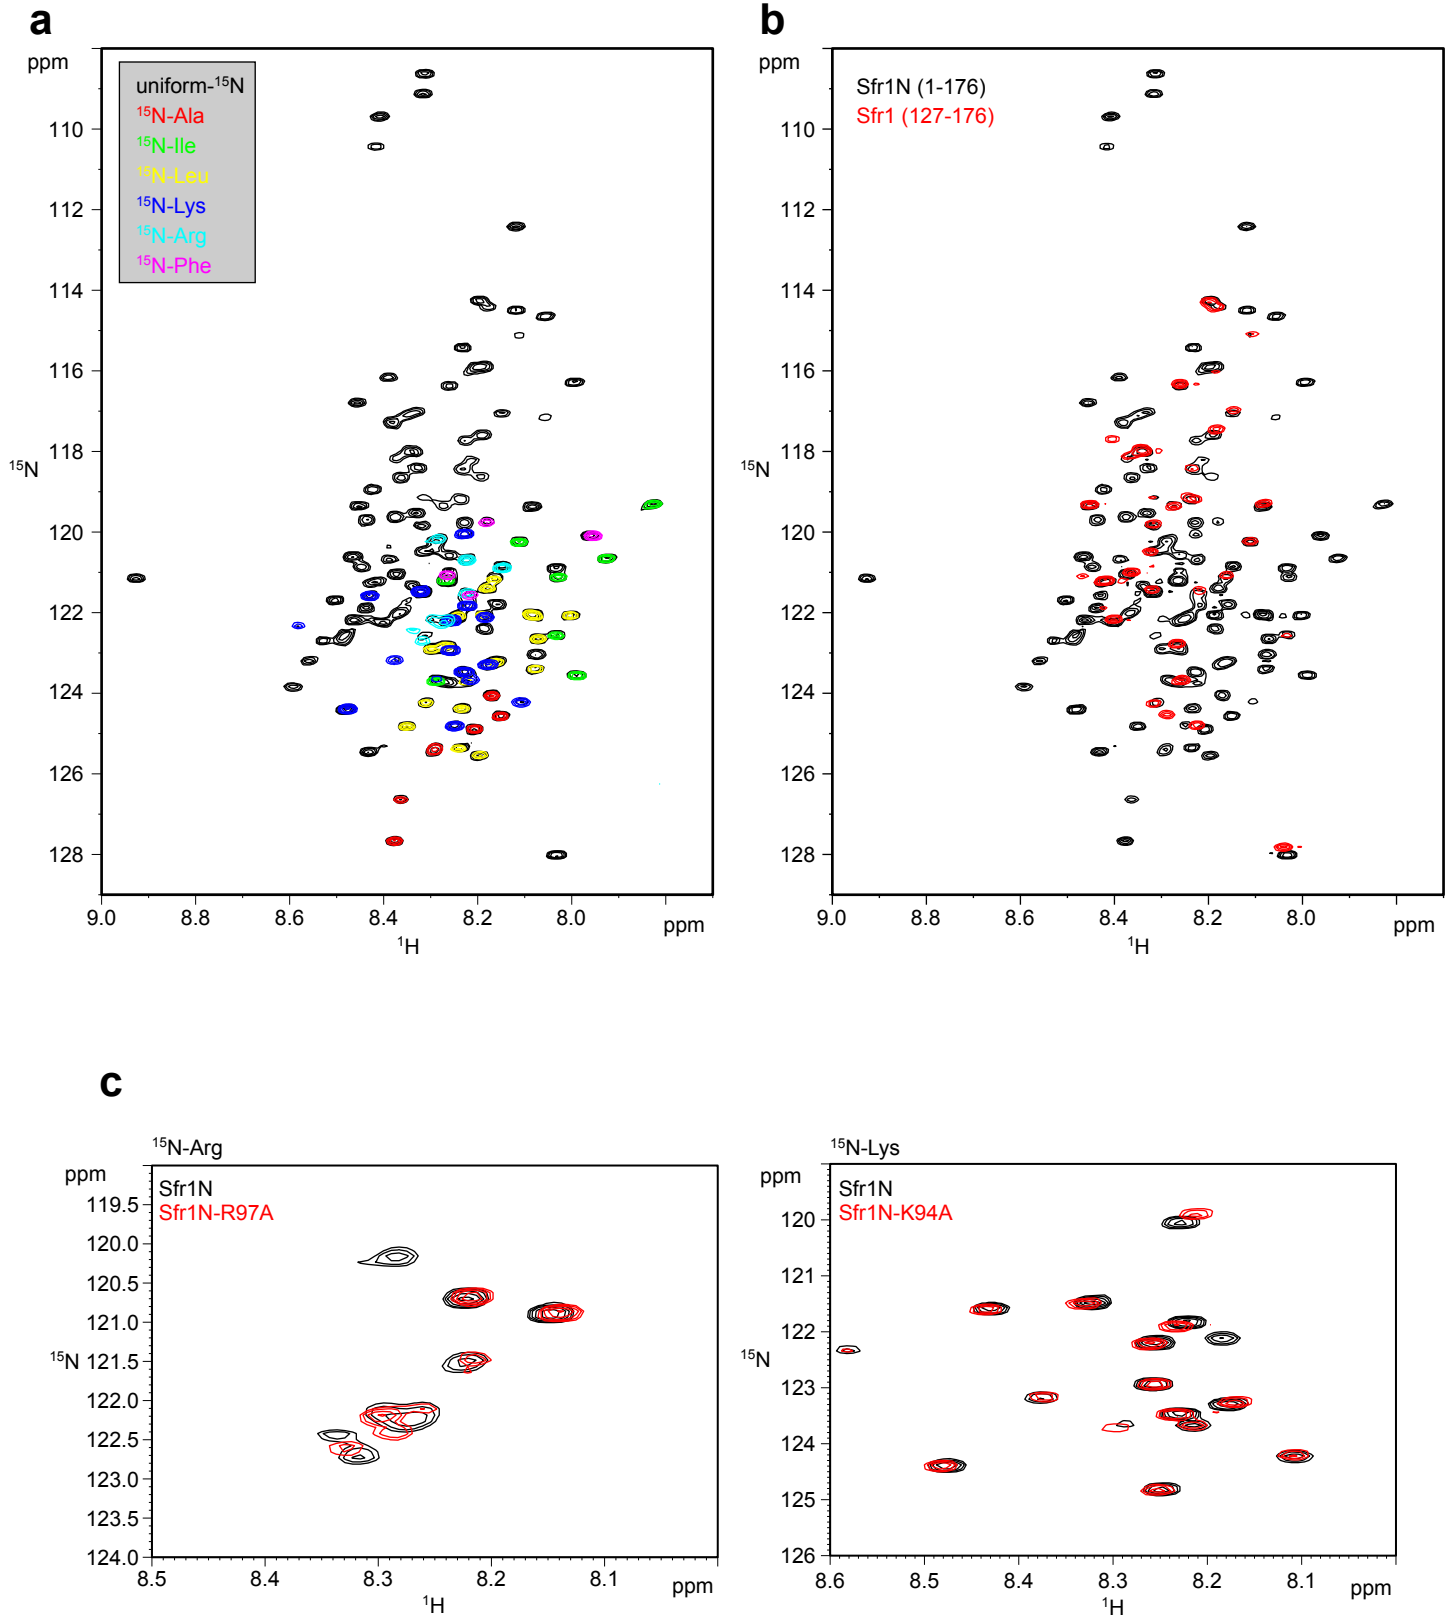

**Supplementary Figure 3.** Changes in Sfr1N NMR signal intensity in response to Rad51 titration and site-specific crosslinking of Sfr1N to Rad51.

**(a-c)** NMR signal intensity of Sfr1N in the presence of the indicated ratio of Rad51 relative to the intensity observed in the absence of Rad51. **(d)** Chemical shift changes observed for the main chain amide NHs of Sfr1N induced by the addition of equimolar Rad51. Chemical shift changes were calculated using the formula  $\Delta\delta = [(\Delta\delta_H)^2 + (\Delta\delta_N \times 0.18)^2]^{1/2}$ , where  $\Delta\delta_H$  and  $\Delta\delta_N$  represent the  $^1\text{H}$  and  $^{15}\text{N}$  chemical shift differences, respectively. The residues that were severely attenuated by the addition of Rad51 were not analyzed and are shown by blanks. **(e)** The extent of non-specific crosslinking was assessed by individual and co-expression of Sfr1N and Rad51 in *E. coli*. **(f)** Specific crosslinking was assessed by expressing Rad51 with a version of Sfr1N in which a residue of interested was mutated to TAG, which encodes the photoreactive amino acid pBPA in this system.

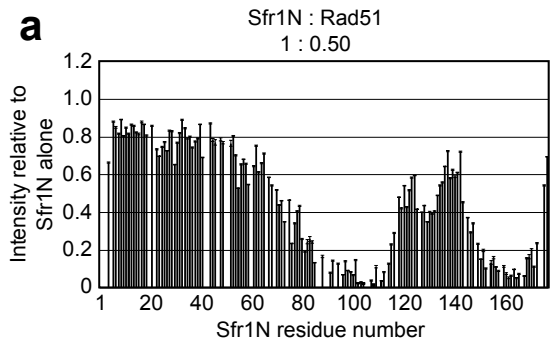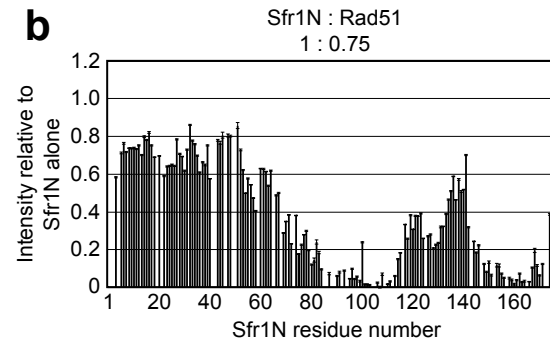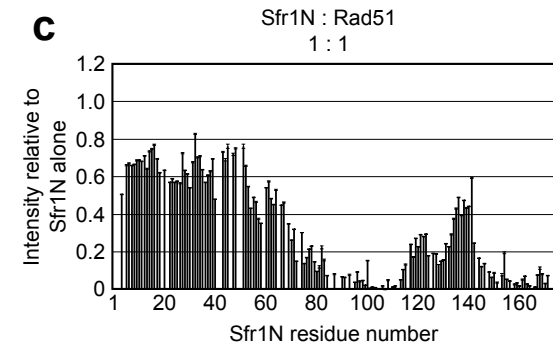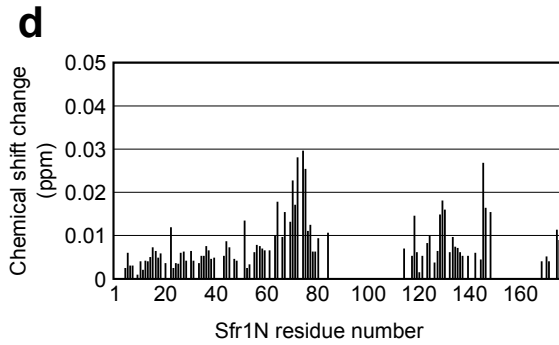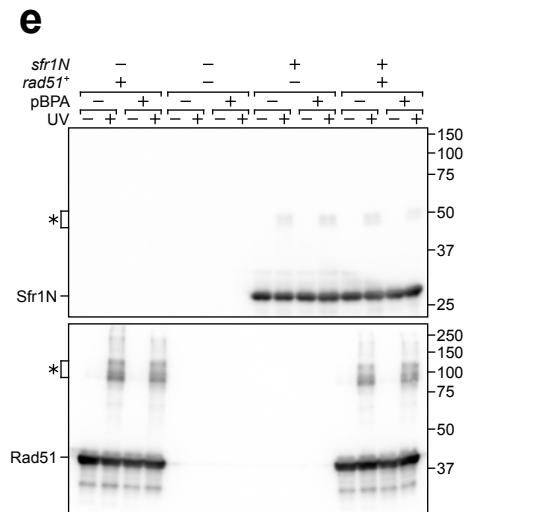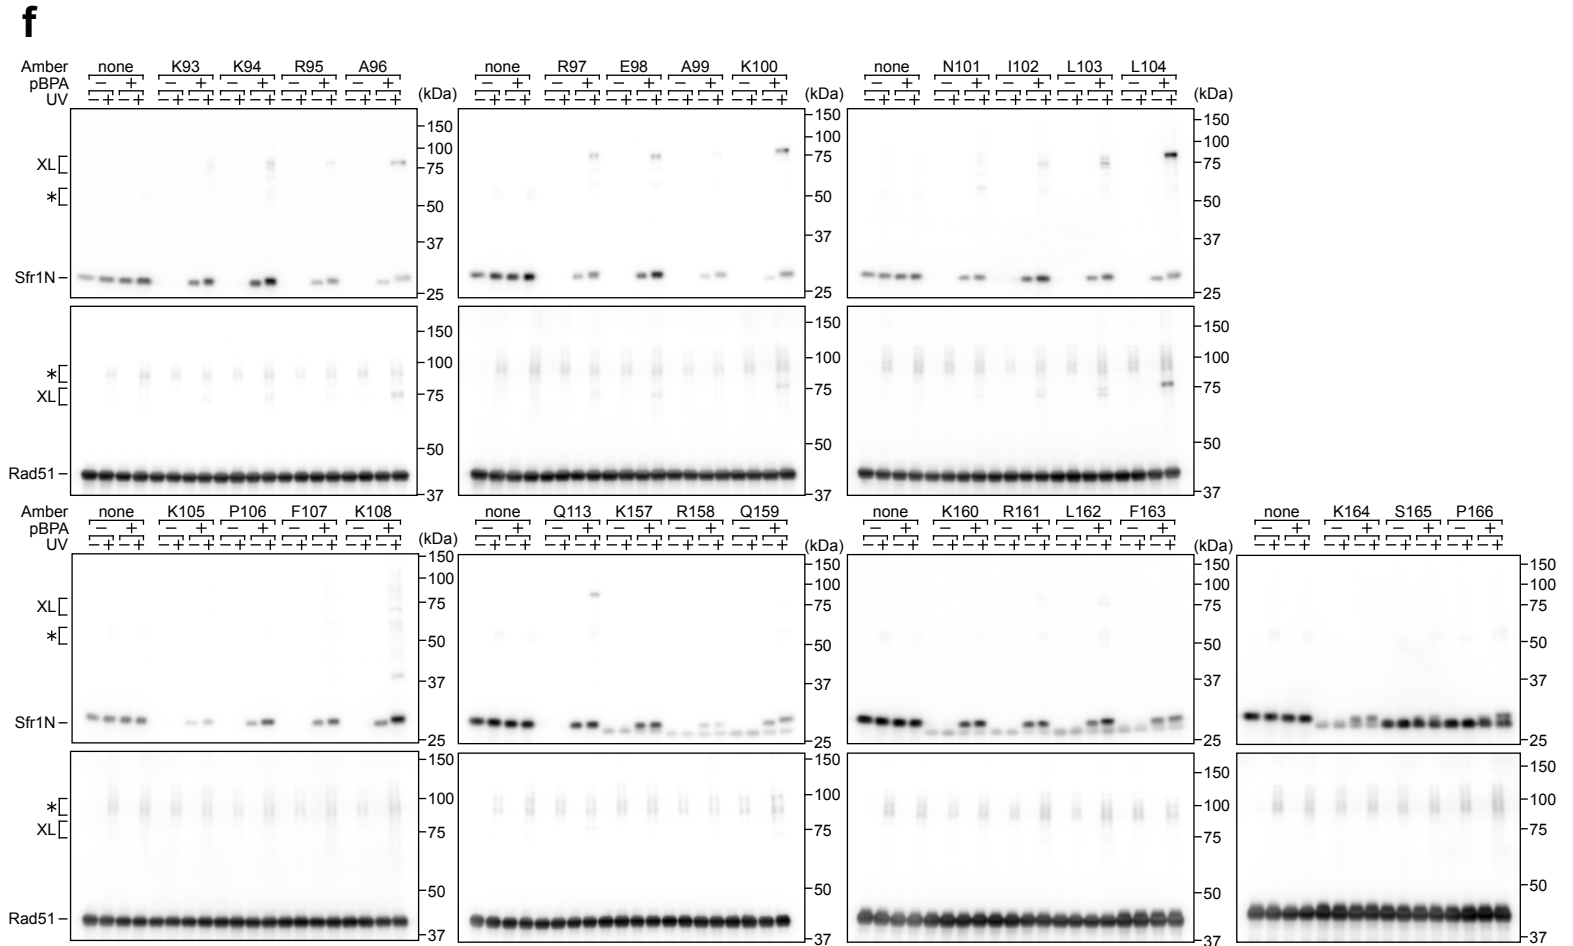

**Supplementary Figure 4.** Identification of residues within Sites 1 and 2 that are important for the functional interaction with Rad51.

**(a)** Sequence alignment of Sfr1 homologs from the genus *Schizosaccharomyces* were generated with Clustal Omega. Sites 1 and 2 in *S. pombe* Sfr1 are underlined. Residues shown in bold are consecutive, positively charged residues within Sites 1 and 2 that were targeted for mutation. **(b)** CBB-stained gel of purified Swi5-Sfr1 (wild type mutants). 7A has mutations in all bold residues from **(a)**, whereas 3A and 4A only contain mutations in bold residues from Sites 1 and 2, respectively. Size markers are annotated on the left in kD. Note that Sfr1 migrates slower than expected from its calculated molecular weight (~33.6 kD), as previously reported<sup>20</sup>. This property is attributable to its N-terminal half<sup>25</sup>, hence why mutation of residues in Sites 1 and 2 affect its electrophoretic mobility. **(c)** Swi5-Sfr1 (S5S1, wild type or mutants) was mixed with Rad51, complexes were IP'd with anti-Rad51 antibodies and the contents of these IPs were assessed by immunoblotting. "-" indicates the omission of Swi5-Sfr1.



**a**

```

S. pombe      MSQTINSELNENATSQCKEDLKVSLSESDLRDSQ-----GQL-----G-----IENPPK
S. japonicus -----MSETNINDTTAKPQEEISSSTDILANVEEKSSIPVE
S. octosporus ME-----KGEDNT-ELGIEADVNLTGSAIDNNSKQSEEAQNI-----N-----TEL PPT
                :: : : * . . . *

S. pombe      CNNSGNHSDNLGFIEQSETVHPENEKALTPDLRDT-KIHTSLPITTPFSKKRAREAKNIL
S. japonicus PLE-PVHVEDENNVPVPPK---DTPVMNTPEPKALHKLDPDQLFTTPI SRKRLRDVKSTL
S. octosporus PSRDD-----PELKPTTPNI--SQDNSDLPSLSMEKHNPAPLNPPNPRKRAREAKSVL
                . . . * . * . : . * : ** * : . * . *

S. pombe      LKPFKSPLRQ-TASQVADTNLKP SLAVTNLNSDETNTSSE-PVTSPLRTTPNSIKRQKR
S. japonicus FKPFKSPVMKLP LTPQNQNTQSPCAHETPI SASEELSSSSDLLSSSPSKASFVRKKRVKR
S. octosporus LKPFKSPLKY-PATPKSTPGTSKVSNYTSDELKSSDEVSSD-PVSSPSRPPPRVIKRAKK
                :*****: :* : . . . . ** : ** : ** :

S. pombe      LFKSPI SNCLNPKSDPEITQLLSRRLKLEKEVRNLQEQLITAETARKVEAKNEDKDLQTL
S. japonicus SFQSPIAS-LKSSSDPELVALLSHRLRVEKEVKTLQDDLNTAEAAFVETKDEDDDLIVL
S. octosporus TFRSPVSSGSKVQSDPEVARLLSERLILEKDV RNLQEQLTTAETAKKVESKNEDKDLEAL
                * : * : . . : . * * * . * * : * * : * * : * * : * * . *

S. pombe      IQKWKNAAQQA AEVLFKPAERIRLAGGVTQSFRIEEGENKGOIQEVRTEFTMSMFLNQF
S. japonicus IHRWRAAAQQAADVLFHPMAERIANAGGVTRCVRLQODG-QEYVSEEKTKYTMGMFLQQF
S. octosporus VYKWRGVAQRAAQVLYQPAERIRLAGGVMQKYTIQEGEDAGQIEEKRTFTMGMFLHQF
                : : * : . * : * : * : * : * * * * * * * * : : : . . : . * : * : * : * : * : *

S. pombe      GVPVHLMSFDEENGDWKS*-
S. japonicus GVPYELIGYDPEEDDWT T*
S. octosporus GVPFDLIAYDEELEDWKN*-
                *** . * : . : * * * * .
    
```

**b**

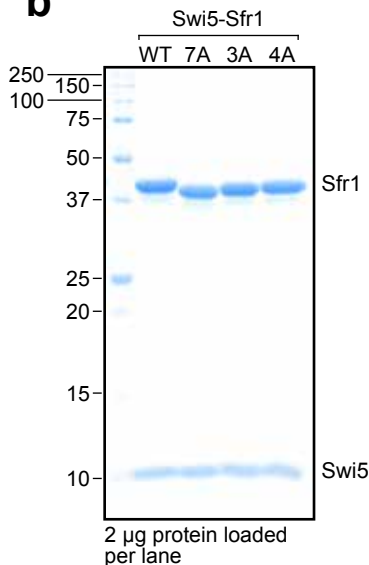

**c**

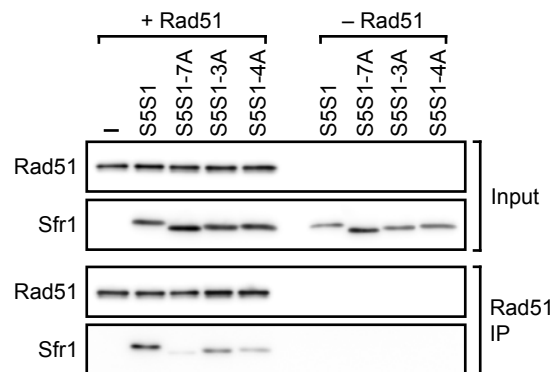

**Supplementary Figure 5.** DNA repair in Rad51 interaction mutants is dependent on Rad57.

**(a,b)** DNA damage sensitivity of the indicated strains was assessed. “No treatment” plate for

**(a)** is shown in **Fig. 7a**. CPT, camptothecin. Bleo., bleomycin. HU, hydroxyurea. Note that

*sfr1*Δ does not sensitize cells to the indicated doses of CPT, bleo. or HU unless

Rad55-Rad57 is absent.

**a**

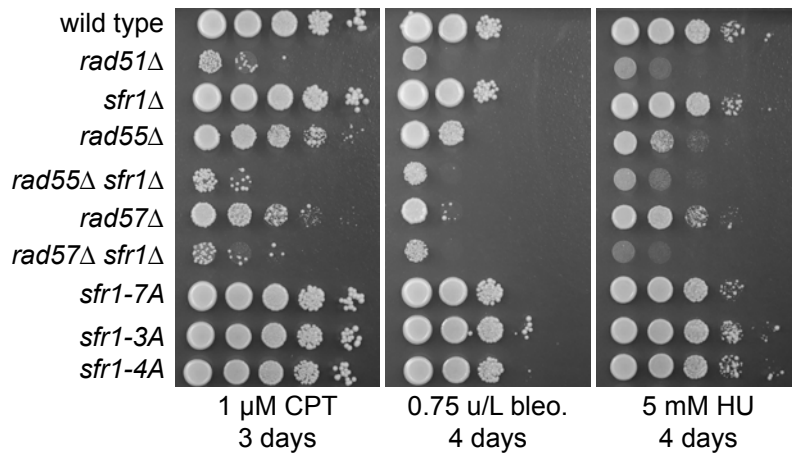

**b**

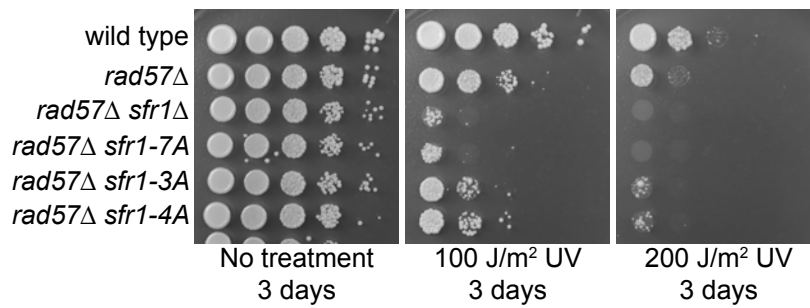

**Supplementary Figure 6.** Molecular sizing of Rad51 and DNA binding by Swi5-Sfr1.

**(a)** Rad51 was analyzed by size-exclusion chromatography. The blue and navy lines indicate the elution profiles of Rad51 and molecular weight standards, respectively. **(b)** Swi5-Sfr1 (S5S1, wild type or mutants) was incubated with ssDNA (top) or dsDNA (bottom) and protein-DNA complexes were resolved by agarose gel electrophoresis.

**a**

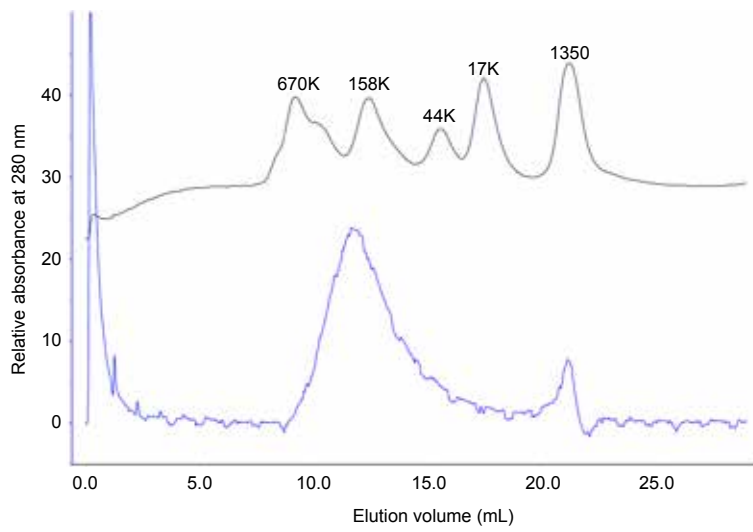

**b**

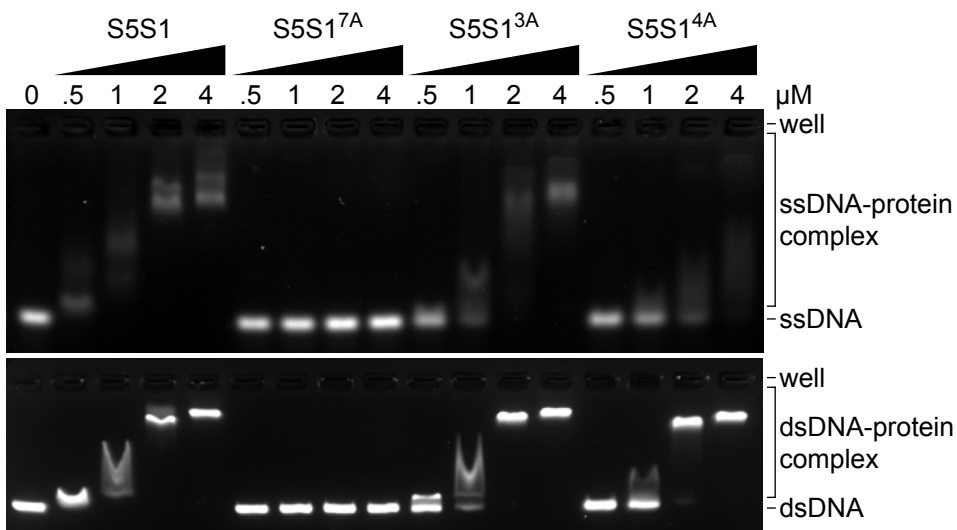

**Supplementary Figure 7.** N-terminal intrinsically disordered domains may be an evolutionarily conserved feature of Sfr1.

**(a-f)** DISOPRED3 was used to predict the likelihood of disorder and protein binding in orthologs of Sfr1 from the indicated species. The likelihood of disorder is shown on the y-axis and residues of Sfr1 are displayed on the x-axis. The dashed line represents a confidence limit of 0.5, above which point DISOPRED3 predicts that a residue is more likely to be disordered than structured. Sequences were obtained from UniProt (*S. pombe*, Q9USV1; *S. japonicus*, B6JYP3; *S. octosporus*, S9R1E2; *Mus musculus*, Q8BP27; *Homo sapiens*, Q86XK3; *S. cerevisiae*, P32489).
